# Supplementary material for: Ion Mobility–Mass Spectrometry Approach for the Comparison of Sheep and Goat Milk Lipidomes
Source: MDPI journal article supplement (doi:10.3390/app13063535), 2023-03-10
Supplement: s1 [file s1]

## Supporting information

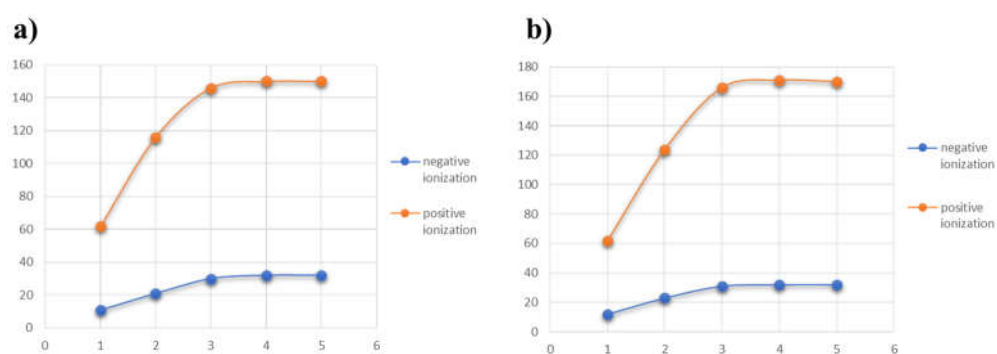

**Figure S1.** Number of annotated lipid features plotted as number of features annotated versus the number of iterative injections of sheep milk (a) and goat milk (b) acquired in the negative (blue) and positive (orange) ionization mode.

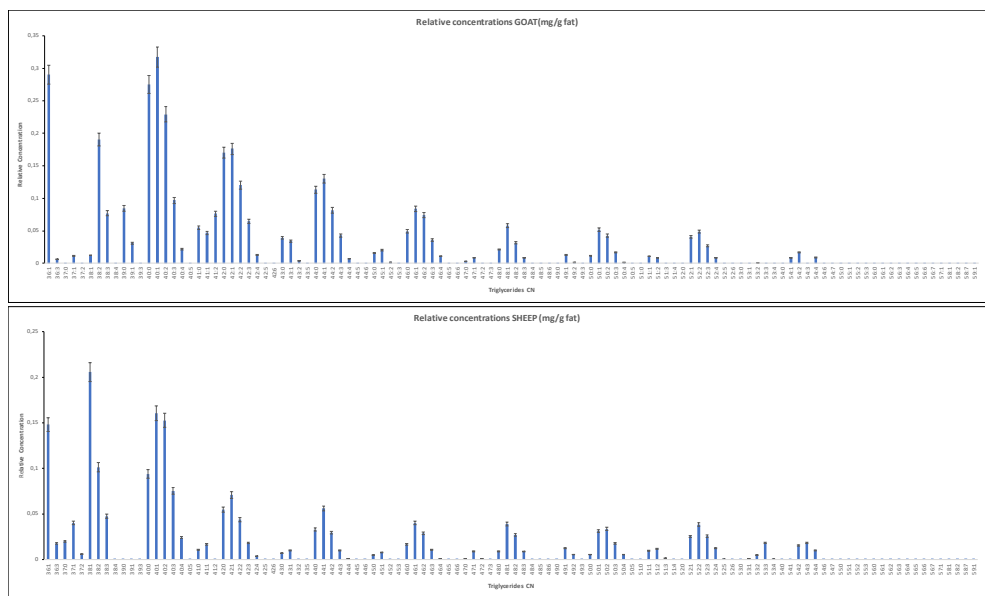

**Figure S2.** TAG distribution with the relative carbon number in sheep (A) and goat (B) milk samples.

**Table S1.** Mass spectrometry and collision cross section characteristics of lipids detected in sheep (S) and goat (G) milk samples and acquired in the positive ionization mode.

| RT<br>(min) | <i>m/z</i> | $\Delta$ ppm | adduct             | formula                                                         | lipid        | milk | CCS<br>(Å <sup>2</sup> ) |
|-------------|------------|--------------|--------------------|-----------------------------------------------------------------|--------------|------|--------------------------|
| 0.881       | 232.1556   | 1.4          | (M+H) <sup>+</sup> | C <sub>11</sub> H <sub>21</sub> NO <sub>4</sub>                 | ACar 4:0     | S    | 156.81                   |
| 1.131       | 520.3398   | 0.8          | (M+H) <sup>+</sup> | C <sub>26</sub> H <sub>50</sub> NO <sub>7</sub> P               | LPC 18:2     | S    | 234.46                   |
| 1.251       | 496.3424   | 5.0          | (M+H) <sup>+</sup> | C <sub>24</sub> H <sub>50</sub> NO <sub>7</sub> P               | LPC 16:0     | S    | 209.88                   |
| 1.299       | 522.3582   | 4.3          | (M+H) <sup>+</sup> | C <sub>26</sub> H <sub>52</sub> NO <sub>7</sub> P               | LPC 18:1     | S    | 238.42                   |
| 1.34        | 480.311    | 5.0          | (M+H) <sup>+</sup> | C <sub>23</sub> H <sub>46</sub> NO <sub>7</sub> P               | LPE 18:1     | S    | 166.96                   |
| 1.606       | 524.3737   | 4.3          | (M+H) <sup>+</sup> | C <sub>26</sub> H <sub>54</sub> NO <sub>7</sub> P               | LPC 18:0     | S/G  | 250.15                   |
| 3.035       | 650.4763   | 1.9          | (M+H) <sup>+</sup> | C <sub>34</sub> H <sub>68</sub> NO <sub>8</sub> P               | PC 26:0      | S/G  | -                        |
| 3.655       | 675.5471   | 4.0          | (M+H) <sup>+</sup> | C <sub>37</sub> H <sub>75</sub> N <sub>2</sub> O <sub>6</sub> P | SM d32:1     | S/G  | 277.2                    |
| 3.787       | 678.5083   | 0.9          | (M+H) <sup>+</sup> | C <sub>36</sub> H <sub>72</sub> NO <sub>8</sub> P               | PC 14:0/14:0 | S/G  | 273.33                   |
|             |            |              |                    |                                                                 | PC 12:0/16:0 | S/G  | 274.02                   |
| 4.001       | 677.5599   | 1.7          | (M+H) <sup>+</sup> | C <sub>37</sub> H <sub>77</sub> N <sub>2</sub> O <sub>6</sub> P | SM d32:0     | S    | -                        |
| 4.112       | 689.5618   | 0.1          | (M+H) <sup>+</sup> | C <sub>38</sub> H <sub>77</sub> N <sub>2</sub> O <sub>6</sub> P | SM d33:1     | S/G  | 262.22                   |
| 4.166       | 730.5396   | 1.1          | (M+H) <sup>+</sup> | C <sub>40</sub> H <sub>76</sub> NO <sub>8</sub> P               | PC 32:2      | S/G  | -                        |
| 4.269       | 786.529    | 0.1          | (M+H) <sup>+</sup> | C <sub>42</sub> H <sub>76</sub> NO <sub>10</sub> P              | PS 18:0/18:3 | S/G  | -                        |
| 4.494       | 756.5556   | 2.0          | (M+H) <sup>+</sup> | C <sub>42</sub> H <sub>78</sub> NO <sub>8</sub> P               | PC 34:3      | S/G  | -                        |
| 4.613       | 703.5792   | 4.4          | (M+H) <sup>+</sup> | C <sub>39</sub> H <sub>79</sub> N <sub>2</sub> O <sub>6</sub> P | SM d34:1     | S/G  | 284.21                   |
| 4.619       | 782.5715   | 1.6          | (M+H) <sup>+</sup> | C <sub>44</sub> H <sub>80</sub> NO <sub>8</sub> P               | PC 18:1/18:4 | S/G  | -                        |
| 4.625       | 836.5448   | 0.2          | (M+H) <sup>+</sup> | C <sub>46</sub> H <sub>78</sub> NO <sub>10</sub> P              | PS 18:1/22:5 | S/G  | -                        |
| 4.751       | 728.522    | 1.9          | (M+H) <sup>+</sup> | C <sub>40</sub> H <sub>74</sub> NO <sub>8</sub> P               | PC 32:3      | S    | -                        |
| 4.755       | 706.5422   | 4.2          | (M+H) <sup>+</sup> | C <sub>38</sub> H <sub>76</sub> NO <sub>8</sub> P               | PC 14:0/16:0 | S/G  | 278.89                   |
| 4.790       | 714.5089   | 0.8          | (M+H) <sup>+</sup> | C <sub>39</sub> H <sub>72</sub> NO <sub>8</sub> P               | PE 16:0/18:3 | S/G  | 290.13                   |
| 4.901       | 729.5918   | 0.1          | (M+H) <sup>+</sup> | C <sub>41</sub> H <sub>81</sub> N <sub>2</sub> O <sub>6</sub> P | SM d36:2     | S/G  | -                        |
| 4.919       | 732.5562   | 2.1          | (M+H) <sup>+</sup> | C <sub>40</sub> H <sub>78</sub> NO <sub>8</sub> P               | PC 14:0/18:1 | S/G  | 282.07                   |
| 4.932       | 838.5616   | 1.7          | (M+H) <sup>+</sup> | C <sub>46</sub> H <sub>80</sub> NO <sub>10</sub> P              | PS 18:0/22:5 | S/G  | -                        |
| 4.94        | 740.5247   | 1.6          | (M+H) <sup>+</sup> | C <sub>41</sub> H <sub>74</sub> NO <sub>8</sub> P               | PE 18:1/18:3 | S/G  | 296.37                   |
| 4.971       | 788.5472   | 1.8          | (M+H) <sup>+</sup> | C <sub>42</sub> H <sub>78</sub> NO <sub>10</sub> P              | PS 36:2      | S/G  | -                        |
| 4.976       | 717.5926   | 2.1          | (M+H) <sup>+</sup> | C <sub>40</sub> H <sub>81</sub> N <sub>2</sub> O <sub>6</sub> P | SM d35:1     | S/G  | -                        |

|       |          |     |                    |                                                                 |                        |     |        |
|-------|----------|-----|--------------------|-----------------------------------------------------------------|------------------------|-----|--------|
| 5.033 | 705.5936 | 1.0 | (M+H) <sup>+</sup> | C <sub>39</sub> H <sub>81</sub> N <sub>2</sub> O <sub>6</sub> P | SM d34:0               | S/G | 280.38 |
| 5.170 | 717.5931 | 1.3 | (M+H) <sup>+</sup> | C <sub>40</sub> H <sub>81</sub> N <sub>2</sub> O <sub>6</sub> P | SM d35:1               | S/G | -      |
| 5.173 | 700.573  | 0.9 | (M+H) <sup>+</sup> | C <sub>40</sub> H <sub>77</sub> NO <sub>8</sub>                 | HexCer_NS<br>18:1/16:0 | S/G | -      |
| 5.189 | 808.5869 | 2.0 | (M+H) <sup>+</sup> | C <sub>46</sub> H <sub>82</sub> NO <sub>8</sub> P               | PC 18:1/20:4           | S/G | 293.2  |
| 5.215 | 758.5735 | 4.0 | (M+H) <sup>+</sup> | C <sub>42</sub> H <sub>80</sub> NO <sub>8</sub> P               | PC 34:2                | S/G | 286.95 |
| 5.236 | 690.5094 | 4.3 | (M+H) <sup>+</sup> | C <sub>37</sub> H <sub>72</sub> NO <sub>8</sub> P               | PE 16:0/16:1           | S/G | -      |
|       |          |     |                    |                                                                 | PE 14:0/18:1           | S/G | -      |
| 5.310 | 814.5601 | 2.2 | (M+H) <sup>+</sup> | C <sub>44</sub> H <sub>80</sub> NO <sub>10</sub> P              | PS 38:3                | S   | -      |
| 5.375 | 784.589  | 3.9 | (M+H) <sup>+</sup> | C <sub>44</sub> H <sub>82</sub> NO <sub>8</sub> P               | PC 36:3                | S/G | 289.79 |
| 5.482 | 746.5716 | 0.1 | (M+H) <sup>+</sup> | C <sub>41</sub> H <sub>80</sub> NO <sub>8</sub> P               | PC 15:0/18:1           | S/G | 193.13 |
| 5.504 | 766.5398 | 1.2 | (M+H) <sup>+</sup> | C <sub>43</sub> H <sub>76</sub> NO <sub>8</sub> P               | PE 18:1/20:4           | S/G | 298.5  |
| 5.554 | 716.5258 | 4.1 | (M+H) <sup>+</sup> | C <sub>39</sub> H <sub>74</sub> NO <sub>8</sub> P               | PE 16:0/18:2           | S/G | 273.72 |
| 5.645 | 792.5584 | 8.0 | (M+H) <sup>+</sup> | C <sub>45</sub> H <sub>78</sub> NO <sub>8</sub> P               | PE 18:1/22:5           | S/G | 304.89 |
| 5.660 | 772.5876 | 0.5 | (M+H) <sup>+</sup> | C <sub>43</sub> H <sub>82</sub> NO <sub>8</sub> P               | PC 17:0/18:2           | S/G | -      |
| 5.723 | 742.5428 | 3.9 | (M+H) <sup>+</sup> | C <sub>41</sub> H <sub>76</sub> NO <sub>8</sub> P               | PE 18:1/18:2           | S/G | 277.12 |
| 5.783 | 731.6103 | 4.1 | (M+H) <sup>+</sup> | C <sub>41</sub> H <sub>83</sub> N <sub>2</sub> O <sub>6</sub> P | SM d36:1               | S/G | 290.61 |
| 5.790 | 790.5631 | 3.8 | (M+H) <sup>+</sup> | C <sub>42</sub> H <sub>80</sub> NO <sub>10</sub> P              | PS 18:0/18:1           | S/G | -      |
| 5.898 | 734.5734 | 4.3 | (M+H) <sup>+</sup> | C <sub>40</sub> H <sub>80</sub> NO <sub>8</sub> P               | PC 16:0/16:0           | S/G | 286.26 |
| 6.023 | 730.5406 | 3.8 | (M+H) <sup>+</sup> | C <sub>40</sub> H <sub>76</sub> NO <sub>8</sub> P               | PE 17:1/18:1           | S/G | -      |
| 6.073 | 760.5897 | 3.8 | (M+H) <sup>+</sup> | C <sub>42</sub> H <sub>82</sub> NO <sub>8</sub> P               | PC 16:0/18:1           | S/G | 297.06 |
| 6.235 | 786.6048 | 3.5 | (M+H) <sup>+</sup> | C <sub>44</sub> H <sub>84</sub> NO <sub>8</sub> P               | PC 18:1/18:1           | S/G | 295.76 |
| 6.331 | 748.586  | 1.4 | (M+H) <sup>+</sup> | C <sub>41</sub> H <sub>82</sub> NO <sub>8</sub> P               | PC 16:0/17:0           | S/G | -      |
| 6.424 | 786.6045 | 3.6 | (M+H) <sup>+</sup> | C <sub>44</sub> H <sub>84</sub> NO <sub>8</sub> P               | PC 18:1/18:1           | S/G | 293.53 |
| 6.444 | 718.5423 | 4.2 | (M+H) <sup>+</sup> | C <sub>39</sub> H <sub>76</sub> NO <sub>8</sub> P               | PE 16:0/18:1           | S/G | -      |
| 6.620 | 744.5582 | 4.8 | (M+H) <sup>+</sup> | C <sub>41</sub> H <sub>78</sub> NO <sub>8</sub> P               | PE 18:1/18:1           | S/G | 284.87 |
| 6.703 | 774.6027 | 0.8 | (M+H) <sup>+</sup> | C <sub>43</sub> H <sub>84</sub> NO <sub>8</sub> P               | PC 35:1                | S/G | -      |
| 6.720 | 538.5216 | 2.1 | (M+H) <sup>+</sup> | C <sub>34</sub> H <sub>67</sub> NO <sub>3</sub>                 | Cer_NS<br>d18:1/16:0   | S   | 231.79 |
| 6.734 | 794.5717 | 1.3 | (M+H) <sup>+</sup> | C <sub>45</sub> H <sub>80</sub> NO <sub>8</sub> P               | PE 18:0/22:5           | S/G | 307.2  |

|       |          |     |                    |                                                                 |                         |     |        |
|-------|----------|-----|--------------------|-----------------------------------------------------------------|-------------------------|-----|--------|
| 7.093 | 732.5556 | 0.9 | (M+H) <sup>+</sup> | C <sub>40</sub> H <sub>78</sub> NO <sub>8</sub> P               | PE 17:0/18:1            | S/G | -      |
| 7.149 | 759.6383 | 1.3 | (M+H) <sup>+</sup> | C <sub>43</sub> H <sub>87</sub> N <sub>2</sub> O <sub>6</sub> P | SM d38:1                | S/G | -      |
| 7.180 | 762.6048 | 3.9 | (M+H) <sup>+</sup> | C <sub>42</sub> H <sub>84</sub> NO <sub>8</sub> P               | PC 16:0/18:0            | S/G | 289.35 |
| 7.190 | 818.5904 | 0.5 | (M+H) <sup>+</sup> | C <sub>44</sub> H <sub>84</sub> NO <sub>10</sub> P              | PS 18:0/22:6            | G   | -      |
| 7.369 | 788.6214 | 3.7 | (M+H) <sup>+</sup> | C <sub>44</sub> H <sub>86</sub> NO <sub>8</sub> P               | PC 18:0/18:1            | S/G | 295.24 |
| 7.418 | 785.6545 | 0.7 | (M+H) <sup>+</sup> | C <sub>45</sub> H <sub>89</sub> N <sub>2</sub> O <sub>6</sub> P | SM d40:2                | S   | -      |
| 7.770 | 746.5736 | 3.6 | (M+H) <sup>+</sup> | C <sub>41</sub> H <sub>80</sub> NO <sub>8</sub> P               | PE 18:0/18:1            | S/G | 284.09 |
| 7.912 | 773.6498 | 1.0 | (M+H) <sup>+</sup> | C <sub>44</sub> H <sub>89</sub> N <sub>2</sub> O <sub>6</sub> P | SM d39:1                | S/G | -      |
| 8.105 | 799.6732 | 1.6 | (M+H) <sup>+</sup> | C <sub>46</sub> H <sub>91</sub> N <sub>2</sub> O <sub>6</sub> P | SM d41:2                | S   | -      |
| 8.470 | 813.6876 | 0.4 | (M+H) <sup>+</sup> | C <sub>47</sub> H <sub>93</sub> N <sub>2</sub> O <sub>6</sub> P | SM d42:2                | S/G | -      |
| 8.508 | 787.6728 | 3.2 | (M+H) <sup>+</sup> | C <sub>45</sub> H <sub>91</sub> N <sub>2</sub> O <sub>6</sub> P | SM d40:1                | S/G | 303.36 |
| 8.527 | 846.6206 | 1.5 | (M+H) <sup>+</sup> | C <sub>46</sub> H <sub>88</sub> NO <sub>10</sub> P              | PS 40:1                 | G   | -      |
| 8.530 | 790.6348 | 2.2 | (M+H) <sup>+</sup> | C <sub>44</sub> H <sub>88</sub> NO <sub>8</sub> P               | PC 16:0/20:0            | S/G | 302.29 |
| 8.891 | 816.6454 | 3.2 | (M+H) <sup>+</sup> | C <sub>46</sub> H <sub>90</sub> NO <sub>8</sub> P               | PC 38:1                 | G   | -      |
| 9.911 | 815.7045 | 2.0 | (M+H) <sup>+</sup> | C <sub>47</sub> H <sub>95</sub> N <sub>2</sub> O <sub>6</sub> P | SM d42:1                | S/G | 303.36 |
| 9.202 | 801.6886 | 2.4 | (M+H) <sup>+</sup> | C <sub>46</sub> H <sub>93</sub> N <sub>2</sub> O <sub>6</sub> P | SM d41:1                | S/G | 306.32 |
| 9.881 | 798.6831 | 0.4 | (M+H) <sup>+</sup> | C <sub>47</sub> H <sub>91</sub> NO <sub>8</sub>                 | HexCer_NS<br>d18:1/23:0 | S/G | -      |

---

**Table S2.** Mass spectrometry and collision cross section characteristics of lipids in the negative ionization mode (G=goat and S=sheep).

| RT<br>(min) | <i>m/z</i> | $\Delta$ ppm | adduct                             | formula                                                         | lipid                  | milk | CCS<br>(Å <sup>2</sup> ) |
|-------------|------------|--------------|------------------------------------|-----------------------------------------------------------------|------------------------|------|--------------------------|
| 1.346       | 478.2945   | 1.1          | (M-H) <sup>-</sup>                 | C <sub>23</sub> H <sub>46</sub> NO <sub>7</sub> P               | LPE 18:1               | S    | 214.84                   |
| 2.387       | 255.2335   | 2.1          | (M-H) <sup>-</sup>                 | C <sub>16</sub> H <sub>32</sub> O <sub>2</sub>                  | FA 16:0                | S    | 169.76                   |
| 2.503       | 281.2493   | 2.2          | (M-H) <sup>-</sup>                 | C <sub>18</sub> H <sub>34</sub> O <sub>2</sub>                  | FA 18:1                | S/G  | 176.5                    |
| 3.672       | 719.5349   | 1.4          | (M+CHO <sub>2</sub> ) <sup>-</sup> | C <sub>37</sub> H <sub>75</sub> N <sub>2</sub> O <sub>6</sub> P | SM d32:1               | S/G  | 271.81                   |
| 4.559       | 835.5339   | 1.1          | (M-H) <sup>-</sup>                 | C <sub>43</sub> H <sub>81</sub> O <sub>13</sub> P               | PC 16:0/18:1           | S/G  | -                        |
| 4.745       | 885.5497   | 0.3          | (M-H) <sup>-</sup>                 | C <sub>47</sub> H <sub>83</sub> O <sub>13</sub> P               | PC 18:0/20:4           | S/G  | -                        |
| 4.782       | 750.5291   | 1.4          | (M+CHO <sub>2</sub> ) <sup>-</sup> | C <sub>38</sub> H <sub>76</sub> NO <sub>8</sub> P               | PC 14:0/16:0           | S/G  | 280.73                   |
| 4.835       | 861.5502   | 1.5          | (M-H) <sup>-</sup>                 | C <sub>45</sub> H <sub>83</sub> O <sub>13</sub> P               | PC 18:0/18:2           | S/G  | -                        |
| 4.959       | 836.5448   | 1.7          | (M-H) <sup>-</sup>                 | C <sub>46</sub> H <sub>80</sub> NO <sub>10</sub> P              | PC 18:0/22:5           | S/G  | 230.68                   |
| 4.999       | 786.5293   | 0.5          | (M-H) <sup>-</sup>                 | C <sub>42</sub> H <sub>78</sub> NO <sub>10</sub> P              | PC 18:0/18:2           | S/G  | 281.45                   |
| 5.410       | 828.5759   | 1.3          | (M+CHO <sub>2</sub> ) <sup>-</sup> | C <sub>44</sub> H <sub>82</sub> NO <sub>8</sub> P               | PC 18:1/18:2           | S/G  | -                        |
| 5.577       | 714.5083   | 1.6          | (M-H) <sup>-</sup>                 | C <sub>39</sub> H <sub>74</sub> NO <sub>8</sub> P               | PC 16:0/18:2           | S/G  | 271.47                   |
| 5.639       | 863.5656   | 0.9          | (M-H) <sup>-</sup>                 | C <sub>45</sub> H <sub>85</sub> O <sub>13</sub> P               | PC 18:0/18:1           | S/G  | -                        |
| 5.744       | 740.5241   | 1.7          | (M-H) <sup>-</sup>                 | C <sub>41</sub> H <sub>76</sub> NO <sub>8</sub> P               | PC 18:1/18:2           | S/G  | 269.13                   |
| 5.81        | 775.5973   | 0            | (M+CHO <sub>2</sub> ) <sup>-</sup> | C <sub>41</sub> H <sub>83</sub> N <sub>2</sub> O <sub>6</sub> P | SM d36:1               | S/G  | -                        |
| 5.820       | 788.5456   | 1.0          | (M-H) <sup>-</sup>                 | C <sub>42</sub> H <sub>80</sub> NO <sub>10</sub> P              | PC 18:0/18:1           | S/G  | 280.39                   |
| 5.935       | 778.5606   | 0.4          | (M+CHO <sub>2</sub> ) <sup>-</sup> | C <sub>40</sub> H <sub>80</sub> NO <sub>8</sub> P               | PC 16:0/16:0           | S/G  | 286.22                   |
| 6.108       | 804.5766   | 1.9          | (M+CHO <sub>2</sub> ) <sup>-</sup> | C <sub>42</sub> H <sub>82</sub> NO <sub>8</sub> P               | PC 16:0/18:1           | S/G  | 290.46                   |
| 6.285       | 830.5919   | 1.2          | (M+CHO <sub>2</sub> ) <sup>-</sup> | C <sub>44</sub> H <sub>84</sub> NO <sub>8</sub> P               | PC 18:1/18:1           | S/G  | 294.47                   |
| 6.445       | 698.5145   | 0.9          | (M-H) <sup>-</sup>                 | C <sub>39</sub> H <sub>74</sub> NO <sub>7</sub> P               | EtherPE 16:1<br>e/18:2 | G    | 265.12                   |
| 6.471       | 716.5243   | 1.4          | (M-H) <sup>-</sup>                 | C <sub>38</sub> H <sub>76</sub> NO <sub>8</sub> P               | PC 16:0/18:1           | S/G  | 271.7                    |
| 6.648       | 742.5408   | 1.9          | (M-H) <sup>-</sup>                 | C <sub>41</sub> H <sub>78</sub> NO <sub>8</sub> P               | PC 18:1/18:1           | S/G  | 277.52                   |
| 6.807       | 742.5398   | 0.9          | (M-H) <sup>-</sup>                 | C <sub>41</sub> H <sub>78</sub> NO <sub>8</sub> P               | PC 18:0/18:2           | S/G  | 271.47                   |
| 7.143       | 700.529    | 1.5          | (M-H) <sup>-</sup>                 | C <sub>39</sub> H <sub>76</sub> NO <sub>7</sub> P               | EtherPE 16:1<br>e/18:1 | S/G  | 266.03                   |
| 7.218       | 806.5919   | 1.3          | (M+CHO <sub>2</sub> ) <sup>-</sup> | C <sub>42</sub> H <sub>84</sub> NO <sub>8</sub> P               | PC 16:0/18:0           | S/G  | -                        |

|       |          |     |                                    |                                                                 |                        |     |        |
|-------|----------|-----|------------------------------------|-----------------------------------------------------------------|------------------------|-----|--------|
| 7.406 | 832.6078 | 0.4 | (M+CHO <sub>2</sub> ) <sup>-</sup> | C <sub>44</sub> H <sub>86</sub> NO <sub>8</sub> P               | PC 18:0/18:1           | S/G | 296.01 |
| 7.423 | 700.5302 | 0.1 | (M-H) <sup>-</sup>                 | C <sub>39</sub> H <sub>76</sub> NO <sub>7</sub> P               | EtherPE 16:1<br>e/18:1 | S/G | 266.03 |
| 7.451 | 726.5446 | 0.2 | (M-H) <sup>-</sup>                 | C <sub>41</sub> H <sub>78</sub> NO <sub>7</sub> P               | EtherPE 18:1<br>e/18:2 | S/G | 271.2  |
| 7.602 | 726.5459 | 0.2 | (M-H) <sup>-</sup>                 | C <sub>41</sub> H <sub>78</sub> NO <sub>7</sub> P               | EtherPE 18:2<br>e/18:1 | S/G | 271.2  |
| 7.624 | 750.5457 | 1.4 | (M-H) <sup>-</sup>                 | C <sub>43</sub> H <sub>78</sub> NO <sub>7</sub> P               | EtherPE 18:1<br>e/20:4 | G   | 280.73 |
| 7.721 | 776.5613 | 0.4 | (M-H) <sup>-</sup>                 | C <sub>45</sub> H <sub>80</sub> NO <sub>7</sub> P               | EtherPE 18:1<br>e/22:5 | G   | 284.88 |
| 7.798 | 726.5460 | 0.2 | (M-H) <sup>-</sup>                 | C <sub>41</sub> H <sub>78</sub> NO <sub>7</sub> P               | EtherPE 18:1<br>e/18:2 | S/G | 271.2  |
| 7.801 | 744.5557 | 2.0 | (M-H) <sup>-</sup>                 | C <sub>41</sub> H <sub>80</sub> NO <sub>8</sub> P               | PC 18:0/18:1           | S/G | 273.17 |
| 8.551 | 831.6599 | 0.1 | (M+CHO <sub>2</sub> ) <sup>-</sup> | C <sub>45</sub> H <sub>91</sub> N <sub>2</sub> O <sub>6</sub> P | SM d40:1               | S/G | -      |
| 8.817 | 728.5613 | 0.1 | (M-H) <sup>-</sup>                 | C <sub>41</sub> H <sub>80</sub> NO <sub>7</sub> P               | EtherPE 18:1<br>e/18:1 | G   | 272.08 |
| 9.243 | 845.6761 | 1.8 | (M+CHO <sub>2</sub> ) <sup>-</sup> | C <sub>46</sub> H <sub>93</sub> N <sub>2</sub> O <sub>6</sub> P | SM d41:1               | S/G | 303.32 |
| 9.952 | 859.6918 | 1.0 | (M+CHO <sub>2</sub> ) <sup>-</sup> | C <sub>47</sub> H <sub>95</sub> N <sub>2</sub> O <sub>6</sub> P | SM d42:1               | S/G | 306    |

---

**Table S3.** TAG concentration in sheep and goat milk (S=sheep and G=goat).

| TAG  | Sheep          |                | Goat           |                |
|------|----------------|----------------|----------------|----------------|
|      | FA composition | μmol           | FA composition | μmol           |
| 36:1 | 18:1_4:0_14:0  | 3,840±0,192    | 18:1_14:0_4:0  | 1,2±0,06       |
| 36:3 | 14:0_4:0_18:3  | 0,624±0,031    | 14:0_4:0_18:3  | 0,0002±0,00001 |
| 37:0 | 17:0_14:0_6:0  | 0,201±0,010    | 14:0_17:0_6:0  | 0,0044±0,0002  |
| 37:0 | 16:0_17:0_4:0  | 0,327±0,016    | 16:0_17:0_4:0  | 0,0051±0,0002  |
| 37:0 | 17:0_10:0_10:0 | 0,158±0,007    | 17:0_10:0_10:0 | 0,0009±0,00004 |
| 37:1 | 16:0_4:0_17:1  | 0,269±0,013    | 16:0_4:0_17:1  | 0,0092±0,0005  |
| 37:2 | 15:0_4:0_18:2  | 0,390±0,019    | 15:0_4:0_18:2  | 0,0052±0,0003  |
| 37:2 | 4:0_16:1_17:1  | 0,121±0,006    | 4:0_17:1_16:1  | 0,00145±0,0001 |
| 38:1 | 16:0_18:1_4:0  | 248,259±12,413 | 16:0_18:1_4:0  | 3,2359±0,1618  |
| 38:2 | 16:0_4:0_18:2  | 1,378±0,069    | 4:0_16:0_18:2  | 0,7273±0,0364  |
| 38:3 | 16:0_4:0_18:3  | 1,111±0,055    | 4:0_16:0_18:3  | 0,0109±0,0005  |
| 38:4 | 16:1_4:0_18:3  | 0,059±0,003    | 4:0_16:1_18:3  | 0,0008±0,0001  |
| 39:0 | 17:0_4:0_18:0  | 0,369±0,018    | 17:0_4:0_18:0  | 0,0034±0,0002  |
| 39:0 | 14:0_10:0_15:0 | 0,119±0,006    | 14:0_10:0_15:0 | 0,0016±0,0001  |
| 39:0 | 10:0_12:0_17:0 | 0,112±0,006    | 10:0_17:0_12:0 | 0,0012±0,0001  |
| 39:0 | 6:0_17:0_16:0  | 0,127±0,006    | 17:0_6:0_16:0  | 0,0017±0,0001  |
| 39:0 | 16:0_10:0_18:0 | 0,162±0,008    | 16:0_18:0_10:0 | 0,001±0,00005  |
| 39:0 | 16:0_8:0_15:0  | 0,137±0,007    | 8:0_16:0_15:0  | 0,0019±0,0001  |
| 39:0 | 14:0_8:0_17:0  | 0,073±0,004    | 8:0_17:0_14:0  | 0,0022±0,0001  |
| 39:1 | 8:0_14:0_17:1  | 0,072±0,004    | 8:0_14:0_17:1  | 0,0021±0,0001  |
| 39:3 | 17:1_4:0_18:2  | 0,171±0,009    | 4:0_18:2_17:1  | 0,003±0,0001   |
| 39:3 | 17:0_4:0_18:3  | 0,087±0,004    | 17:0_4:0_18:3  | 0,0016±0,0001  |
| 39:3 | 4:0_17:2_18:1  | 0,038±0,002    | 4:0_18:1_17:2  | 0,0003±0,00002 |
| 40:0 | 12:0_12:0_16:0 | 0,276±0,014    | 12:0_16:0_12:0 | 0,0014±0,00007 |
| 40:0 | 16:0_14:0_10:0 | 0,584±0,029    | 14:0_16:0_10:0 | 0,0066±0,0003  |
| 40:0 | 18:0_12:0_10:0 | 0,220±0,011    | 18:0_12:0_10:0 | 0,0032±0,0002  |
| 40:1 | 16:0_6:0_18:1  | 59,328±2,966   | 16:0_6:0_18:1  | 0,0511±0,0025  |
| 40:1 | -              | -              | 14:0_8:0_18:1  | 0,0122±0,0006  |
| 40:1 | -              | -              | 12:0_10:0_18:1 | 0,0063±0,0003  |
| 40:2 | 18:1_4:0_18:1  | 1,744±0,087    | 18:1_4:0_18:1  | 0,0233±0,0011  |
| 40:2 | 6:0_18:2_16:0  | 1,549±0,077    | 6:0_16:0_18:2  | 0,0098±0,0005  |
| 40:3 | 16:0_6:0_18:3  | 0,189±0,009    | 6:0_16:0_18:3  | 0,0012±0,00006 |
| 40:3 | 4:0_18:1_18:2  | 0,518±0,026    | 18:1_4:0_18:2  | 0,0143±0,0007  |
| 40:4 | 18:1_4:0_18:3  | 0,937±0,047    | 18:1_4:0_18:3  | 0,0086±0,0004  |
| 40:4 | 4:0_18:2_18:2  | 0,231±0,012    | 4:0_18:2_18:2  | 0,0018±0,00009 |
| 40:5 | 4:0_18:2_18:3  | 0,367±0,018    | 18:2_4:0_18:3  | 0,0056±0,0003  |
| 41:0 | 10:0_14:0_17:0 | 0,068±0,003    | 10:0_14:0_17:0 | 0,0038±0,0002  |
| 41:0 | 15:0_10:0_16:0 | 0,125±0,006    | 15:0_10:0_16:0 | 0,0068±0,0003  |
| 41:0 | 14:0_12:0_15:0 | 0,042±0,002    | 14:0_12:0_15:0 | 0,0025±0,0001  |
| 41:0 | 12:0_12:0_17:0 | 0,036±0,002    | 12:0_12:0_17:0 | 0,0011±0,00006 |
| 41:1 | 12:0_12:0_17:1 | 0,033±0,002    | 12:0_12:0_17:1 | 0,0005±0,0001  |
| 41:2 | 17:0_6:0_18:2  | 0,329±0,016    | 6:0_17:0_18:2  | 0,0021±0,0001  |
| 41:2 | 17:1_6:0_18:1  | 0,157±0,008    | -              | -              |
| 41:2 | -              | -              | 8:0_15:0_18:2  | 0,0016±0,0001  |
| 42:0 | 16:0_12:0_14:0 | 0,966±0,048    | 16:0_12:0_14:0 | 0,0108±0,0005  |



|      |                |               |                |               |
|------|----------------|---------------|----------------|---------------|
| 42:0 | 10:0_12:0_18:0 | 0,660±0,033   | 10:0_12:0_18:0 | 0,0076±0,0004 |
| 42:0 | 16:0_14:0_18:0 | 0,571±0,029   | 16:0_14:0_18:0 | 0,0086±0,0004 |
| 42:1 | 10:0_14:0_18:1 | 0,622±0,031   | 10:0_14:0_18:1 | 0,015±0,0005  |
| 42:1 | 8:0_18:1_16:0  | 0,555±0,028   | 16:0_8:0_18:1  | 0,0131±0,0006 |
| 42:2 | 18:1_18:1_6:0  | 0,348±0,017   | 18:1_18:1_6:0  | 0,002±0,0001  |
| 42:2 | -              | -             | 10:0_14:0_18:2 | 0,0008±0,0004 |
| 42:2 | 16:0_8:0_18:2  | 0,145±0,007   | 16:0_8:0_18:2  | 0,0013±0,0006 |
| 42:3 | 18:1_6:0_18:2  | 0,282±0,014   | 18:1_6:0_18:2  | 0,0048±0,0002 |
| 42:3 | 14:0_10:0_18:3 | 0,102±0,005   | 10:0_14:0_18:3 | 0,0029±0,0001 |
| 42:4 | 18:2_18:2_6:0  | 0,207±0,010   | 18:2_18:2_6:0  | 0,0034±0,0001 |
| 42:4 | 18:1_6:0_18:3  | 0,288±0,014   | 18:1_6:0_18:3  | 0,0082±0,0004 |
| 42:5 | 16:0_4:0_22:5  | 0,277±0,014   | 16:0_4:0_22:5  | 0,0052±0,0002 |
| 42:6 | 4:0_18:2_20:4  | 0,041±0,002   | 18:2_4:0_20:4  | 0,0016±0,0001 |
| 43:0 | 10:0_18:0_15:0 | 0,142±0,007   | 10:0_15:0_18:0 | 0,0043±0,0002 |
| 43:0 | 16:0_17:0_10:0 | 0,205±0,0103  | 16:0_17:0_10:0 | 0,0046±0,0002 |
| 43:0 | 16:0_11:0_16:0 | 0,096±0,005   | 16:0_11:0_16:0 | 0,0014±0,0001 |
| 43:0 | 14:0_11:0_18:0 | 0,095±0,005   | 14:0_11:0_18:0 | 0,0012±0,0001 |
| 43:0 | 15:0_11:0_17:0 | 0,068±0,003   | 15:0_11:0_17:0 | 0,0017±0,0001 |
| 43:0 | 12:0_16:0_15:0 | 0,081±0,004   | 12:0_16:0_15:0 | 0,0007±0,0001 |
| 43:0 | 12:0_13:0_18:0 | 0,061±0,003   | 12:0_13:0_18:0 | 0,0011±0,0001 |
| 43:0 | 12:0_17:0_14:0 | 0,076±0,004   | 12:0_14:0_17:0 | 0,0007±0,0001 |
| 43:0 | 13:0_15:0_15:0 | 0,013±0,0006  | 15:0_13:0_15:0 | 0,0003±0,0001 |
| 43:0 | 14:0_13:0_16:0 | 0,034±0,002   | 13:0_14:0_16:0 | 0,0004±0,0001 |
| 43:0 | 17:0_13:0_13:0 | 0,022±0,001   | 17:0_13:0_13:0 | 0,0006±0,0001 |
| 43:0 | 14:0_15:0_14:0 | 0,025±0,001   | 14:0_15:0_14:0 | 0,0004±0,0001 |
| 43:1 | 16:0_9:0_18:1  | 0,081±0,004   | 9:0_16:0_18:1  | 0,0022±0,0001 |
| 43:1 | 15:0_10:0_18:1 | 0,173±0,008   | 15:0_10:0_18:1 | 0,0044±0,0002 |
| 43:1 | 10:0_16:0_17:1 | 0,090±0,005   | 10:0_17:1_16:0 | 0,0016±0,0001 |
| 43:1 | 17:1_12:0_14:0 | 0,045±0,003   | 17:1_12:0_14:0 | 0,0004±0,0001 |
| 43:2 | 17:1_9:0_17:1  | 0,024±0,001   | 17:1_9:0_17:1  | 0,001±0,0001  |
| 43:2 | 18:1_7:0_18:1  | 0,058±0,003   | 18:1_7:0_18:1  | 0,0015±0,0001 |
| 43:2 | 9:0_16:0_18:2  | 0,033±0,002   | 16:0_9:0_18:2  | 0,0009±0,0001 |
| 43:2 | 18:2_10:0_15:0 | 0,110±0,005   | 10:0_18:2_15:0 | 0,0018±0,0001 |
| 43:5 | 22:5_17:0_4:0  | 0,070±0,003   | 22:5_4:0_17:0  | 0,0015±0,0001 |
| 44:0 | 16:0_10:0_18:0 | 0,198±0,010   | 16:0_10:0_18:0 | 0,0089±0,0004 |
| 44:0 | 12:0_14:0_18:0 | 0,073±0,004   | 12:0_14:0_18:0 | 0,0017±0,0001 |
| 44:0 | 16:0_12:0_16:0 | 0,021±0,001   | 16:0_12:0_16:0 | 0,0004±0,0001 |
| 44:0 | 14:0_14:0_16:0 | 0,054±0,003   | 14:0_14:0_16:0 | 0,0018±0,0001 |
| 44:1 | 16:0_10:0_18:1 | 1,469±0,073   | 16:0_10:0_18:1 | 0,0147±0,0007 |
| 44:1 | 12:0_14:0_18:1 | 0,370±0,018   | 14:0_12:0_18:1 | 0,0074±0,0003 |
| 44:2 | 16:0_10:0_18:1 | 0,19394±0,009 | 10:0_16:0_18:1 | 0,0032±0,0001 |
| 44:2 | 12:0_14:0_18:2 | 0,131±0,007   | 12:0_14:0_18:2 | 0,0021±0,0001 |
| 44:2 | 16:1_12:0_16:1 | 0,021±0,001   | 16:1_12:0_16:1 | 0,0005±0,0001 |
| 44:2 | 8:0_18:1_18:1  | 0,140±0,007   | 8:0_18:1_18:1  | 0,0024±0,0001 |
| 44:2 | 10:0_18:1_16:1 | 0,093±0,005   | 10:0_18:1_16:1 | 0,0018±0,0001 |
| 44:3 | 14:0_12:0_18:3 | 0,050±0,002   | 12:0_14:0_18:3 | 0,0004±0,0001 |
| 44:3 | 8:0_18:2_18:1  | 0,334±0,017   | 8:0_18:2_18:1  | 0,0056±0,0002 |
| 44:3 | 10:0_16:0_18:3 | 0,042±0,002   | 10:0_16:0_18:3 | 0,0004±0,0001 |
| 44:3 | 16:0_10:1_18:2 | 0,095±0,005   | 10:1_16:0_18:2 | 0,0016±0,0001 |
| 44:4 | 8:0_18:3_18:1  | 0,220±0,011   | 8:0_18:3_18:1  | 0,0049±0,0002 |

|      |                |              |                |                |
|------|----------------|--------------|----------------|----------------|
| 44:4 | 8:0_18:2_18:2  | 0,097±0,005  | 8:0_18:2_18:2  | 0,0016±0,0001  |
| 44:5 | 16:0_6:0_22:5  | 0,210±0,010  | -              | 0±0            |
| 44:6 | 18:1_4:0_22:5  | 0,131±0,007  | 18:1_4:0_22:5  | 0,002±0,0001   |
| 45:0 | 14:0_15:0_16:0 | 0,174±0,009  | 15:0_14:0_16:0 | 0,0017±0,0001  |
| 45:0 | 14:0_14:0_17:0 | 0,149±0,007  | 14:0_14:0_17:0 | 0,0023±0,0001  |
| 45:0 | 15:0_12:0_18:0 | 0,127±0,006  | 15:0_12:0_18:0 | 0,004±0,0002   |
| 45:0 | 16:0_12:0_17:0 | 0,164±0,008  | 16:0_12:0_17:0 | 0,0034±0,0001  |
| 45:1 | 16:0_12:0_17:1 | 0,055±0,003  | 16:0_12:0_17:1 | 0,0006±0,00003 |
| 45:1 | 10:0_17:0_18:1 | 0,160±0,008  | 10:0_17:0_18:1 | 0,0011±0,0001  |
| 45:2 | 12:0_15:0_18:2 | 0,016±0,0008 | 12:0_15:0_18:2 | 0,0005±0,0001  |
| 45:2 | 17:1_10:0_18:1 | 0,043±0,002  | 10:0_17:1_18:1 | 0,0016±0,0001  |
| 45:3 | 12:0_15:0_18:3 | 0,061±0,003  | 15:0_12:0_18:3 | 0,0012±0,0001  |
| 45:3 | 10:0_17:0_18:3 | 28,143±1,407 | 10:0_18:3_17:0 | 0,0014±0,0001  |
| 45:3 | 17:1_18:2_10:0 | 28,125±1,406 | 10:0_17:1_18:2 | 0,4814±0,0240  |
| 45:3 | 18:1_9:0_18:2  | 0,066±0,003  | 9:0_18:1_18:2  | 0,4806±0,0243  |
| 46:0 | 12:0_16:0_18:0 | 0,063±0,003  | 16:0_12:0_18:0 | 0,0025±0,0001  |
| 46:0 | 16:0_14:0_16:0 | 0,030±0,001  | 14:0_16:0_16:0 | 0,0006±0,0001  |
| 46:0 | 14:0_14:0_18:0 | 0,045±0,002  | 14:0_14:0_18:0 | 0,0021±0,0001  |
| 46:1 | 16:1_18:0_12:0 | 0,240±0,012  | 18:0_16:1_12:0 | 0,0048±0,0002  |
| 46:1 | 16:0_16:1_14:0 | 0,522±0,026  | 16:0_16:1_14:0 | 0,0101±0,0005  |
| 46:1 | 14:0_14:0_18:1 | 0,665±0,033  | 14:0_14:0_18:1 | 0,0116±0,0005  |
| 46:1 | 16:0_12:0_18:1 | 0,385±0,019  | 16:0_12:0_18:1 | 0,0093±0,0004  |
| 46:1 | 10:0_18:0_18:1 | 0,115±0,006  | 10:0_18:0_18:1 | 0,0042±0,0002  |
| 46:2 | 14:0_14:0_18:2 | 0,041±0,002  | 14:0_14:0_18:2 | 0,0005±0,0001  |
| 46:2 | 10:0_18:1_18:1 | 0,076±0,004  | 10:0_18:1_18:1 | 0,0021±0,0001  |
| 46:2 | 12:0_16:0_18:2 | 0,051±0,002  | 16:0_12:0_18:2 | 0,001±0,0001   |
| 46:3 | 10:0_18:2_18:1 | 0,160±0,008  | 18:1_10:0_18:2 | 0,0107±0,0005  |
| 46:4 | 18:1_10:0_18:3 | 0,201±0,010  | 10:0_18:1_18:3 | 0,0081±0,0004  |
| 46:4 | 10:0_18:2_18:2 | 0,101±0,005  | 10:0_18:2_18:2 | 0,0022±0,0001  |
| 46:5 | 16:0_8:0_22:5  | 0,108±0,005  | 16:0_8:0_22:5  | 0,0017±0,0001  |
| 46:5 | 10:0_14:0_22:5 | 0,030±0,001  | -              | -              |
| 46:6 | -              | -            | 22:5_18:1_6:0  | 0,0008±0,0001  |
| 47:0 | 15:0_14:0_18:0 | 0,059±0,003  | -              | -              |
| 47:0 | 16:0_14:0_17:0 | 0,067±0,003  | -              | -              |
| 47:0 | 15:0_16:0_16:0 | 0,059±0,003  | 15:0_16:0_16:0 | 0,003±0,0001   |
| 47:1 | 14:0_17:1_16:0 | 0,347±0,017  | 14:0_16:0_17:1 | 0,0035±0,0002  |
| 47:2 | 17:1_12:0_18:1 | 0,121±0,006  | 12:0_17:1_18:1 | 0,002±0,0001   |
| 47:2 | 14:0_16:0_18:2 | 0,164±0,008  | 14:0_16:0_18:2 | 0,0007±0,0001  |
| 47:3 | 17:1_12:0_18:2 | 0,066±0,003  | 17:1_12:0_18:2 | 0,0007±0,0001  |
| 47:3 | 14:0_18:3_15:0 | 0,099±0,005  | 15:0_14:0_18:3 | 0,0004±0,0001  |
| 47:3 | 12:0_17:0_18:3 | 0,075±0,004  | 17:0_12:0_18:3 | 0,0004±0,0001  |
| 48:0 | 16:0_14:0_18:0 | 1,332±0,066  | 16:0_14:0_18:0 | 0,0312±0,0016  |
| 48:1 | 18:1_14:0_16:0 | 40,491±2,024 | 18:1_14:0_16:0 | 0,0151±0,0007  |
| 48:2 | 18:1_12:0_18:1 | 1,002±0,050  | 18:1_12:0_18:1 | 0,0169±0,0008  |
| 48:2 | 16:0_18:2_14:0 | 0,318±0,016  | 16:0_14:0_18:2 | 0,0058±0,0003  |
| 48:2 | 18:1_14:0_16:1 | 0,245±0,012  | 14:0_16:1_18:1 | 0,0042±0,0002  |
| 48:2 | 16:0_16:1_16:1 | 0,206±0,010  | 16:0_16:1_16:1 | 0,0019±0,0001  |
| 48:3 | 18:1_12:0_18:2 | 0,226±0,011  | 18:1_12:0_18:2 | 0,0077±0,0003  |
| 48:4 | 12:0_20:4_16:0 | 0,045±0,002  | 12:0_20:4_16:0 | 0,0009±0,0001  |
| 48:4 | 14:0_20:4_14:0 | 0,011±0,0006 | 14:0_20:4_14:0 | 0,0002±0,0001  |

|      |                |              |                |               |
|------|----------------|--------------|----------------|---------------|
| 48:5 | 10:0_16:0_22:5 | 0,121±0,006  | 10:0_22:5_16:0 | 0,001±0,0001  |
| 48:6 | -              | -            | 16:0_10:0_22:6 | 0,0025±0,0001 |
| 49:0 | 17:0_14:0_18:0 | 0,093±0,005  | 17:0_14:0_18:0 | 0,0021±0,0001 |
| 49:0 | 16:0_15:0_18:0 | 0,111±0,005  | 16:0_15:0_18:0 | 0,0024±0,0001 |
| 49:0 | 17:0_15:0_17:0 | 0,026±0,001  | 17:0_15:0_17:0 | 0,0005±0,0001 |
| 49:0 | 16:0_17:0_16:0 | 0,079±0,004  | 16:0_17:0_16:0 | 0,0014±0,0001 |
| 49:1 | 14:0_18:1_17:0 | 0,097±0,005  | 14:0_18:1_17:0 | 0,0014±0,0001 |
| 49:1 | 15:0_17:1_17:0 | 81,721±4,086 | 15:0_17:1_17:0 | 0,0082±0,0004 |
| 49:1 | 15:0_18:1_16:0 | 81,533±4,077 | 16:0_15:0_18:1 | 0,0017±0,0001 |
| 49:2 | 16:0_18:2_15:0 | 0,053±0,003  | 15:0_16:0_18:2 | 0,0017±0,0001 |
| 49:2 | 14:0_17:0_18:2 | 0,037±0,002  | 14:0_17:0_18:2 | 0,0012±0,0001 |
| 49:2 | 15:0_16:1_18:1 | 0,079±0,004  | 15:0_16:1_18:1 | 0,0017±0,0001 |
| 49:2 | 17:1_16:1_16:0 | 0,033±0,002  | 17:1_16:1_16:0 | 0,001±0,0001  |
| 49:2 | 17:1_17:1_15:0 | 0,020±0,001  | 17:1_17:1_15:0 | 0,0006±0,0001 |
| 49:2 | 16:1_17:0_16:1 | 0,008±0,0004 | 16:1_16:1_17:0 | 0,0005±0,0001 |
| 49:3 | 15:0_16:1_18:2 | 0,042±0,002  | 15:0_16:1_18:2 | 0,0012±0,0001 |
| 49:3 | 17:1_18:2_14:0 | 0,039±0,002  | 17:1_18:2_14:0 | 0,0005±0,0001 |
| 49:3 | 13:0_18:2_18:1 | 0,040±0,002  | 18:2_13:0_18:1 | 0,0011±0,0001 |
| 49:3 | 14:0_18:3_17:0 | 0,039±0,002  | 17:0_14:0_18:3 | 0,0011±0,0001 |
| 49:3 | 16:0_15:0_18:3 | 0,067±0,003  | 16:0_15:0_18:3 | 0,0019±0,0001 |
| 50:0 | 16:0_16:0_18:0 | 3,709±0,185  | 16:0_16:0_18:0 | 0,3984±0,012  |
| 50:0 | 16:0_20:0_14:0 | 0,160±0,008  | 16:0_14:0_20:0 | 0,0005±0,0001 |
| 50:0 | 18:0_14:0_18:0 | 0,238±0,012  | 18:0_14:0_18:0 | 5,6242±0,2812 |
| 50:1 | 18:0_14:0_18:1 | 0,754±0,038  | 18:0_14:0_18:1 | 0,0265±0,0013 |
| 50:1 | 16:0_18:1_16:0 | 0,934±0,047  | 16:0_16:0_18:1 | 0,0323±0,0016 |
| 50:2 | 18:1_14:0_18:1 | 15,640±0,782 | 18:1_14:0_18:1 | 0,0191±0,001  |
| 50:2 | 16:0_16:1_18:1 | 0,757±0,038  | 16:0_16:1_18:1 | 0,0051±0,0003 |
| 50:2 | 16:0_16:0_18:2 | 0,249±0,012  | 16:0_16:0_18:2 | 0,0011±0,0001 |
| 50:3 | 16:0_16:1_18:2 | 0,373±0,019  | 16:0_16:1_18:2 | 0,0041±0,0002 |
| 50:3 | 18:1_18:2_14:0 | 0,459±0,023  | 18:1_18:2_14:0 | 0,0062±0,0003 |
| 50:4 | 18:1_14:0_18:3 | 0,224±0,011  | 18:1_14:0_18:3 | 0,0078±0,0004 |
| 50:4 | 18:2_14:0_18:2 | 0,068±0,003  | 14:0_18:2_18:2 | 0,0012±0,0001 |
| 50:4 | 14:0_20:4_16:0 | 2,864±0,143  | 14:0_20:4_16:0 | 0,0013±0,0001 |
| 50:5 | 14:0_22:5_14:0 | 0,020±0,001  | 14:0_22:5_14:0 | 0,0008±0,0001 |
| 50:5 | 16:0_12:0_22:5 | 0,008±0,0004 | 16:0_12:0_22:5 | 0,0001±0,0001 |
| 51:0 | 16:0_17:0_18:0 | 0,174±0,009  | 17:0_16:0_18:0 | 0,0049±0,0003 |
| 51:1 | 16:0_17:0_18:1 | 0,960±0,048  | 16:0_17:0_18:1 | 0,0096±0,0005 |
| 51:1 | 18:1_15:0_18:0 | 0,556±0,028  | 18:1_15:0_18:0 | 0,0073±0,0004 |
| 51:2 | 15:0_18:1_18:1 | 0,111±0,005  | 15:0_18:1_18:1 | 0,0038±0,0002 |
| 51:2 | 16:0_17:1_18:1 | 0,111±0,005  | 16:0_17:1_18:1 | 0,0041±0,0002 |
| 51:3 | 16:1_17:0_18:2 | 0,087±0,004  | 16:1_17:0_18:2 | 0,001±0,0001  |
| 51:3 | 18:2_16:0_17:1 | 0,058±0,003  | 18:2_16:0_17:1 | 0,0008±0,0001 |
| 51:3 | 18:2_16:0_18:1 | 0,143±0,007  | 18:2_16:0_18:1 | 0,0027±0,0001 |
| 51:3 | 17:0_16:0_18:3 | 0,042±0,002  | 16:0_17:0_18:3 | 0,0004±0,0001 |
| 51:4 | -              | -            | 16:0_17:1_18:3 | 0,0005±0,0001 |
| 51:4 | 18:3_15:0_18:1 | 0,127±0,006  | 18:3_15:0_18:1 | 0,0013±0,0001 |
| 51:4 | 18:2_18:2_15:0 | 0,047±0,002  | 18:2_15:0_18:2 | 0,0007±0,0001 |
| 52:0 | 16:0_18:0_18:0 | 0,297±0,015  | 16:0_18:0_18:0 | 0,0049±0,0003 |
| 52:1 | 16:0_18:0_18:1 | 1,964±0,098  | 16:0_18:0_18:1 | 0,0399±0,0021 |
| 52:2 | 16:0_18:2_18:0 | 0,326±0,016  | 16:0_18:2_18:0 | 0,0022±0,0001 |

|      |                |              |                |                |
|------|----------------|--------------|----------------|----------------|
| 52:2 | 18:1_16:0_18:1 | 0,471±0,023  | 18:1_16:0_18:1 | 0,0041±0,0002  |
| 52:3 | 16:0_18:2_18:1 | 1,829±0,091  | 18:2_16:0_18:1 | 0,0142±0,0007  |
| 52:4 | 18:1_16:0_18:3 | 0,428±0,021  | 18:1_16:0_18:3 | 0,0088±0,0004  |
| 52:4 | 16:0_18:2_18:2 | 0,238±0,012  | 16:0_18:2_18:2 | 0,0066±0,0003  |
| 52:5 | -              | -            | 14:0_16:0_22:5 | 0,0001±0,00004 |
| 52:5 | 14:0_20:4_18:1 | 0,030±0,001  | -              | -              |
| 52:6 | 18:1_14:0_20:5 | 0,120±0,006  | 18:1_14:0_20:5 | 0,0018±0,0001  |
| 52:6 | 14:0_20:4_18:2 | 0,040±0,002  | 14:0_18:2_20:4 | 0,0003±0,0001  |
| 53:0 | 23:0_14:0_16:0 | 0,057±0,003  | 23:0_14:0_16:0 | 0,0006±0,0001  |
| 53:0 | 14:0_21:0_18:0 | 0,042±0,002  | 21:0_14:0_18:0 | 0,0005±0,0001  |
| 53:0 | 15:0_15:0_23:0 | 0,021±0,001  | 15:0_15:0_23:0 | 0,0004±0,0001  |
| 53:0 | 17:0_15:0_21:0 | 0,040±0,002  | 17:0_15:0_21:0 | 0,0009±0,0001  |
| 53:0 | 16:0_21:0_16:0 | 0,027±0,001  | 21:0_16:0_16:0 | 0,0004±0,0001  |
| 53:0 | 16:0_19:0_18:0 | 0,025±0,001  | 19:0_16:0_18:0 | 0,0008±0,0001  |
| 53:0 | 17:0_18:0_18:0 | 0,015±0,001  | 18:0_17:0_18:0 | 0,0006±0,0001  |
| 53:0 | 19:0_17:0_17:0 | 0,017±0,001  | 19:0_17:0_17:0 | 0,0005±0,0001  |
| 53:1 | 16:0_18:1_19:0 | 0,067±0,003  | 16:0_18:1_19:0 | 0,0014±0,0001  |
| 53:1 | 17:0_18:1_18:0 | 0,119±0,006  | 17:0_18:1_18:0 | 0,0035±0,0002  |
| 53:2 | 18:1_17:0_18:1 | 54,220±2,711 | 18:1_17:0_18:1 | 0,0031±0,0002  |
| 53:2 | 18:0_17:0_18:2 | 53,879±2,694 | 17:0_18:2_18:0 | 0,0017±0,0001  |
| 53:3 | 17:0_18:1_18:2 | 0,084±0,004  | 18:1_17:0_18:2 | 0,004±0,0002   |
| 53:3 | 18:1_17:1_18:1 | 0,052±0,003  | 17:1_18:1_18:1 | 0,0024±0,0001  |
| 53:4 | 17:1_18:1_18:2 | 0,128±0,006  | 18:1_17:1_18:2 | 0,0019±0,0001  |
| 53:4 | 18:1_17:0_18:3 | 0,138±0,007  | 18:1_17:0_18:3 | 0,0015±0,0001  |
| 54:0 | 16:0_20:0_18:0 | 0,129±0,007  | 16:0_20:0_18:0 | 0,0019±0,0001  |
| 54:1 | 18:0_18:1_18:0 | 0,759±0,038  | 18:1_18:0_18:0 | 0,006±0,0003   |
| 54:1 | 18:1_16:0_20:0 | 0,439±0,022  | 18:1_20:0_16:0 | 0,0067±0,0003  |
| 54:2 | 18:1_18:0_18:1 | 1,321±0,066  | 18:1_18:1_18:0 | 0,0252±0,0013  |
| 54:3 | 18:1_18:1_18:1 | 5,150±0,257  | 18:1_18:1_18:1 | 0,0842±0,0042  |
| 54:4 | 18:1_18:1_18:2 | 0,558±0,0279 | 18:1_18:1_18:2 | 0,007±0,0004   |
| 54:6 | 18:1_16:0_20:5 | 0,097±0,005  | 18:1_16:0_20:5 | 0,0005±0,0001  |
| 54:7 | 18:2_16:0_20:5 | 0,067±0,003  | -              | -              |
| 55:0 | -              | -            | 14:0_18:0_23:0 | 0,001±0,0001   |
| 55:0 | -              | -            | 16:0_21:0_18:0 | 0,0005±0,0001  |
| 55:0 | 16:0_23:0_16:0 | 0,199±0,010  | 16:0_23:0_16:0 | 0,0005±0,0001  |
| 55:1 | -              | -            | 21:0_16:0_18:1 | 0,0033±0,0002  |
| 55:1 | -              | -            | 16:0_23:1_16:0 | 0,0006±0,0001  |
| 55:2 | 18:0_19:1_18:1 | 0,177±0,009  | 18:0_18:1_19:1 | 0,0024±0,0001  |
| 55:2 | 18:1_18:1_19:0 | 0,128±0,006  | 18:1_19:0_18:1 | 0,0014±0,0001  |
| 55:3 | 18:1_18:1_19:1 | 0,258±0,013  | 18:1_18:1_19:1 | 0,003±0,0002   |
| 56:0 | 26:0_14:0_16:0 | 0,047±0,002  | 26:0_14:0_16:0 | 0,0003±0,0001  |
| 56:0 | 18:0_14:0_24:0 | 0,048±0,002  | 18:0_24:0_14:0 | 0,116±0,0058   |
| 56:0 | 16:0_22:0_18:0 | 0,048±0,002  | 22:0_16:0_18:0 | 0,116±0,0058   |
| 56:0 | 24:0_16:0_16:0 | 0,022±0,001  | 24:0_16:0_16:0 | 0,0001±0,0001  |
| 56:1 | 22:0_16:0_18:1 | 0,222±0,011  | 22:0_16:0_18:1 | 0,0022±0,0001  |
| 56:1 | 16:0_16:1_24:0 | 0,087±0,004  | 16:0_16:1_24:0 | 0,0009±0,0001  |
| 56:1 | 18:1_20:0_18:0 | 0,139±0,007  | 18:1_20:0_18:0 | 0,0012±0,0001  |
| 56:1 | 18:0_24:1_18:0 | 0,040±0,002  | 18:0_24:1_18:0 | 0,0005±0,0001  |
| 56:1 | 16:0_20:0_20:1 | 0,117±0,006  | 16:0_20:1_20:0 | 0,0003±0,0001  |
| 56:1 | 16:0_16:0_24:1 | 0,030±0,002  | 16:0_16:0_24:1 | 0,0002±0,0001  |

|      |                |             |                |               |
|------|----------------|-------------|----------------|---------------|
| 56:2 | 16:0_20:1_20:1 | 0,042±0,002 | 16:0_20:1_20:1 | 0,0005±0,0001 |
| 56:2 | 18:0_20:1_18:1 | 0,134±0,007 | 18:0_20:1_18:1 | 0,0023±0,0001 |
| 56:2 | 16:0_22:1_18:1 | 0,124±0,006 | 18:1_16:0_22:1 | 0,002±0,0001  |
| 56:3 | 18:1_20:1_18:1 | 0,200±0,010 | 18:1_20:1_18:1 | 0,8633±0,0431 |
| 56:4 | 18:0_18:1_20:3 | 0,131±0,007 | 18:0_18:1_20:3 | 0,0019±0,0001 |
| 56:4 | 16:0_18:1_22:3 | 0,293±0,015 | 16:0_18:1_22:3 | 0,0012±0,0001 |
| 56:5 | 16:0_22:4_18:1 | 0,080±0,004 | 16:0_22:4_18:1 | 0,0009±0,0001 |
| 56:6 | 16:0_18:1_22:5 | 0,293±0,015 | 18:1_16:0_22:5 | 0,0015±0,0001 |
| 56:7 | -              | -           | 18:1_16:0_22:6 | 0,0019±0,0001 |
| 57:1 | 18:0_21:0_18:1 | 0,052±0,003 | 18:1_18:0_21:0 | 0,001±0,0001  |
| 57:1 | 16:0_25:1_16:0 | 0,052±0,003 | 16:0_25:1_16:0 | 0,0009±0,0001 |
| 57:1 | -              | -           | 16:0_23:1_18:0 | 0,0003±0,0001 |
| 57:1 | 23:0_16:0_18:1 | 0,113±0,006 | 23:0_16:0_18:1 | 0,0015±0,0001 |
| 58:1 | 18:1_16:0_24:0 | 0,034±0,002 | 18:1_16:0_24:0 | 0,0005±0,0001 |
| 58:1 | 18:1_18:0_22:0 | 0,027±0,001 | -              | -             |
| 58:2 | 16:0_24:1_18:1 | 0,213±0,011 | 16:0_24:1_18:1 | 0,0016±0,0001 |
| 58:7 | -              | -           | 18:1_18:1_22:5 | 0,0013±0,0001 |

**Table S4.** List of TAG annotated by MS spectra analysis and comparison of reference mass spectra.

| RT<br>(min) | <i>m/z</i> | formula                                        | sum<br>comp. | sheep          | TAG      | CCS<br>(Å <sup>2</sup> ) | goat           | TAG      | CCS<br>(Å <sup>2</sup> ) |
|-------------|------------|------------------------------------------------|--------------|----------------|----------|--------------------------|----------------|----------|--------------------------|
| 10.802      | 654.5699   | C <sub>39</sub> H <sub>72</sub> O <sub>6</sub> | 36:1         | 18:1_4:0_14:0  | OBuM     | 271.49                   | 18:1_14:0_4:0  | OMBu     | 272.57                   |
| 8.454       | 650.539    | C <sub>39</sub> H <sub>68</sub> O <sub>6</sub> | 36:3         | 14:0_4:0_18:3  | MBuLn    | 264.14                   | 14:0_4:0_18:3  | MBuLn    | 264.14                   |
| 12.841      | 670.6011   | C <sub>40</sub> H <sub>70</sub> O <sub>6</sub> | 37:0         | 17:0_14:0_6:0  | MaMCo+   | 283.73                   | 14:0_17:0_6:0  | MMaCo +  | 277.75                   |
|             |            |                                                |              | 16:0_17:0_4:0  | PMaBu+   | 276.44                   | 16:0_17:0_4:0  | PMaBu +  | 276.44                   |
|             |            |                                                |              | 17:0_10:0_10:0 | MaCaCa   | 278.16                   | 17:0_10:0_10:0 | MaCaCa   | 278.16                   |
| 12.284      | 668.5838   | C <sub>40</sub> H <sub>74</sub> O <sub>6</sub> | 37:1         | 16:0_4:0_17:1  | PBuMo+   | 274.68                   | 16:0_4:0_17:1  | PBuMo +  | 274.68                   |
|             |            |                                                |              | 4:0_15:0_18:1  | BuPaO    | 274.76                   | 4:0_15:0_18:1  | BuPaO    | 274.76                   |
| 10.281      | 666.5705   | C <sub>40</sub> H <sub>72</sub> O <sub>6</sub> | 37:2         | 15:0_4:0_18:2  | PaBuL+   | -                        | 15:0_4:0_18:2  | PaBuL +  | -                        |
|             |            |                                                |              | 4:0_16:1_17:1  | BuPoMo   | -                        | 4:0_17:1_16:1  | BuMoPo   | -                        |
| 13.115      | 684.6169   | C <sub>41</sub> H <sub>78</sub> O <sub>6</sub> | 38:0         | 16:0_14:0_8:0  | PMCy+    | 281.70                   | 16:0_8:0_14:0  | PCyM +   | 282.73                   |
|             |            |                                                |              | 14:0_14:0_10:0 | MMCa     | 286.77                   | 14:0_14:0_10:0 | MMCa     | 286.77                   |
| 11.945      | 682.6013   | C <sub>41</sub> H <sub>76</sub> O <sub>6</sub> | 38:1         | 16:0_18:1_4:0  | POBu     | 279.25                   | 16:0_18:1_4:0  | POBu     | 279.25                   |
| 11.001      | 680.5868   | C <sub>41</sub> H <sub>74</sub> O <sub>6</sub> | 38:2         | 16:0_4:0_18:2  | PBuL     | 275.79                   | 4:0_16:0_18:2  | BuPL     | 276.03                   |
| 10.212      | 678.5698   | C <sub>41</sub> H <sub>72</sub> O <sub>6</sub> | 38:3         | 16:0_4:0_18:3  | PBuLn    | 272.81                   | 4:0_16:0_18:3  | BuPLn    | 273.33                   |
| 8.853       | 676.5541   | C <sub>41</sub> H <sub>70</sub> O <sub>6</sub> | 38:4         | 16:1_4:0_18:3  | PoBuLn + | -                        | 4:0_16:1_18:3  | BuPoLn + | 270.43                   |
| 13.689      | 698.6324   | C <sub>42</sub> H <sub>80</sub> O <sub>6</sub> | 39:0         | 17:0_4:0_18:0  | MaBuS    | 284.72                   | 17:0_4:0_18:0  | MaBuS    | 284.72                   |
|             |            |                                                |              | 14:0_10:0_15:0 | MCaMa +  | 284.28                   | 14:0_10:0_15:0 | MCaMa +  | 284.28                   |
|             |            |                                                |              | 10:0_12:0_17:0 | CaLaMa + | 281.62                   | 10:0_17:0_12:0 | CaMaLa + | 284.71                   |
|             |            |                                                |              | 6:0_17:0_16:0  | CoMaP +  | -                        | 17:0_6:0_16:0  | MaCoP +  | 283.62                   |
|             |            |                                                |              | 16:0_10:0_18:0 | PCaS +   | -                        | 16:0_18:0_10:0 | PSCa +   | 284.72                   |
|             |            |                                                |              | 16:0_8:0_15:0  | PCyPa +  | -                        | 8:0_16:0_15:0  | CyPPa +  | 282.33                   |
|             |            |                                                |              | 14:0_8:0_17:0  | MCyMa    | -                        | 8:0_17:0_14:0  | CyMaM    | -                        |
| 13.553      | 696.6144   | C <sub>42</sub> H <sub>78</sub> O <sub>6</sub> | 39:1         | 8:0_14:0_17:1  | CyMMo    | 281.88                   | 8:0_14:0_17:1  | CyMMo    | 281.88                   |
| 10.554      | 692.5829   | C <sub>42</sub> H <sub>74</sub> O <sub>6</sub> | 39:3         | 17:1_4:0_18:2  | MoBuL +  | -                        | 4:0_18:2_17:1  | BuLMO +  | -                        |
|             |            |                                                |              | 17:0_4:0_18:3  | MaBuLn+  | -                        | 17:0_4:0_18:3  | MaBuLn + | -                        |
|             |            |                                                |              | 4:0_17:2_18:1  | BuHdO    | -                        | 4:0_18:1_17:2  | BuOHd    | -                        |

|        |          |                                                |      |                |         |        |                |         |         |
|--------|----------|------------------------------------------------|------|----------------|---------|--------|----------------|---------|---------|
| 14.08  | 712.648  | C <sub>43</sub> H <sub>82</sub> O <sub>6</sub> | 40:0 | 12:0_12:0_16:0 | LaLaP + | 289.51 | 12:0_12:0_16:0 | LaLaP + | 289.51  |
|        |          |                                                |      | 16:0_10:0_14:0 | PCaM +  | 289.02 | 16:0_14:0_10:0 | PMCa +  | 289.82  |
|        |          |                                                |      | 18:0_12:0_10:0 | SLaCa   | 288.71 | 18:0_12:0_10:0 | SLaCa   | 288.71  |
| 13.346 | 710.6323 | C <sub>43</sub> H <sub>80</sub> O <sub>6</sub> | 40:1 | 16:0_6:0_18:1  | PCoO    | 299.01 | 16:0_6:0_18:1  | PCoO+   | -       |
|        |          |                                                |      | n.d.           | n.d.    | -      | 14:0_8:0_18:1  | MCyO +  | 286.80  |
|        |          |                                                |      | n.d.           | n.d.    | -      | 12:0_10:0_18:1 | LaCyO   | 286.06  |
| 12.348 | 708.6165 | C <sub>43</sub> H <sub>78</sub> O <sub>6</sub> | 40:2 | 4:0_18:1_18:1  | BuOO +  | 304.87 | 4:0_18:1_18:1  | BuOO +  | 304.87  |
|        |          |                                                |      | 6:0_18:2_16:0  | CoLP    | 282.61 | 6:0_16:0_18:2  | CoPL    | -       |
| 11.23  | 706.6025 | C <sub>43</sub> H <sub>76</sub> O <sub>6</sub> | 40:3 | 16:0_6:0_18:3  | PCoLn + | 275.70 | 6:0_16:0_18:3  | CoPLn + | 280.08  |
|        |          |                                                |      | 4:0_18:1_18:2  | BuOL    | 284.64 | 18:1_4:0_18:2  | OBuL    | 283.16  |
| 10.386 | 704.5854 | C <sub>43</sub> H <sub>74</sub> O <sub>6</sub> | 40:4 | 18:1_4:0_18:3  | OBuLn + | 276.88 | 18:1_4:0_18:3  | OBuLn + | 276.88  |
|        |          |                                                |      | 4:0_18:2_18:2  | BuLL    | 276.75 | 4:0_18:2_18:2  | BuLL    | 276.75  |
| 9.186  | 702.5693 | C <sub>43</sub> H <sub>72</sub> O <sub>6</sub> | 40:5 | 4:0_18:2_18:3  | BuLLn   | -      | 4:0_18:2_18:3  | BuLLn   | -       |
| 14.473 | 726.6636 | C <sub>44</sub> H <sub>84</sub> O <sub>6</sub> | 41:0 | 10:0_14:0_17:0 | CaMMa + | 292.07 | 10:0_14:0_17:0 | CaMMa + | 292.07  |
|        |          |                                                |      | 15:0_10:0_16:0 | PaCaP + | 291.94 | 15:0_10:0_16:0 | PaCaP + | 291.94  |
|        |          |                                                |      | 14:0_12:0_15:0 | MLaPa + | 291.64 | 14:0_12:0_15:0 | MLaPa + | 291.64  |
|        |          |                                                |      | 12:0_12:0_17:0 | LaLaMa  | -      | 12:0_12:0_17:0 | LaLaMa  | -       |
| 13.646 | 724.6491 | C <sub>44</sub> H <sub>82</sub> O <sub>6</sub> | 41:1 | 12:0_12:0_17:1 | LaLaMo  | 289.72 | 12:0_12:0_17:1 | LaLaMo  | 289.72  |
| 12.739 | 722.6266 | C <sub>44</sub> H <sub>80</sub> O <sub>6</sub> | 41:2 | 17:1_6:0_18:1  | MoCoO + | -      | n.d.           | n.d.    | -       |
|        |          |                                                |      | 17:0_6:0_18:2  | MaCoL + | -      | 6:0_17:0_18:2  | CoMaL + | -       |
| 14.788 | 740.6793 | C <sub>45</sub> H <sub>86</sub> O <sub>6</sub> | 42:0 | 16:0_12:0_14:0 | PLaM +  | 304.16 | 16:0_12:0_14:0 | PLaM +  | 304.16  |
|        |          |                                                |      | 10:0_12:0_18:0 | CaLaS + | 299.43 | 10:0_12:0_18:0 | CaLaS + | 299.43  |
|        |          |                                                |      | 16:0_14:0_18:0 | PMS     | 295.80 | 16:0_14:0_18:0 | PMS     | 295.8   |
| 14.216 | 738.6637 | C <sub>45</sub> H <sub>84</sub> O <sub>6</sub> | 42:1 | 10:0_14:0_18:1 | CaMO +  | 292.96 | 10:0_14:0_18:1 | CaMO +  | 292.96  |
|        |          |                                                |      | 8:0_18:1_16:0  | CyOP    | 294.22 | 16:0_8:0_18:1  | PCyO    | 292.38  |
| 13.479 | 736.6478 | C <sub>45</sub> H <sub>82</sub> O <sub>6</sub> | 42:2 | 18:1_18:1_6:0  | OOCo +  | 291.78 | 18:1_18:1_6:0  | OOCo +  | 291.78  |
|        |          |                                                |      | n.d.           | n.d.    | -      | 10:0_14:0_18:2 | CaML +  | 290.97, |
|        |          |                                                |      | 16:0_8:0_18:2  | PCyL    | 304.87 | 16:0_8:0_18:2  | PCyL    | 304.87  |
| 12.588 | 734.6322 | C <sub>45</sub> H <sub>80</sub> O <sub>6</sub> | 42:3 | 18:1_6:0_18:2  | OCOL +  | 287.78 | 18:1_6:0_18:2  | OCOL +  | 287.78  |
|        |          |                                                |      | 14:0_10:0_18:3 | MCaLn   | 288.02 | 10:0_14:0_18:3 | CaMLn   | 287.23  |

|        |          |                                                |      |                |            |        |                |          |        |
|--------|----------|------------------------------------------------|------|----------------|------------|--------|----------------|----------|--------|
| 11.631 | 732.6166 | C <sub>45</sub> H <sub>78</sub> O <sub>6</sub> | 42:4 | 18:2_18:2_6:0  | LLCo +     | 282.07 | 18:2_18:2_6:0  | LLCo +   | 282.07 |
|        |          |                                                |      | 18:1_6:0_18:3  | OCOLn      | 284.26 | 18:1_6:0_18:3  | OCOLn    | 284.26 |
| 10.847 | 730.6021 | C <sub>45</sub> H <sub>76</sub> O <sub>6</sub> | 42:5 | 16:0_4:0_22:5  | PBuDp      | 285.16 | 16:0_4:0_22:5  | PBuDp    | 285.16 |
| 9.976  | 728.5833 | C <sub>45</sub> H <sub>74</sub> O <sub>6</sub> | 42:6 | 4:0_18:2_20:4  | BuLAo +    | -      | 18:2_4:0_20:4  | LBuAo +  | 281.33 |
| 15.018 | 754.6959 | C <sub>46</sub> H <sub>88</sub> O <sub>6</sub> | 43:0 | 10:0_18:0_15:0 | CaSPa +    | 298.47 | 10:0_15:0_18:0 | CaPaS +  | 298.72 |
|        |          |                                                |      | 16:0_17:0_10:0 | PMaCa +    | 298.72 | 16:0_17:0_10:0 | PMaCa +  | 298.72 |
|        |          |                                                |      | 16:0_11:0_16:0 | PUP +      | -      | 16:0_11:0_16:0 | PUP +    | -      |
|        |          |                                                |      | 14:0_11:0_18:0 | MUS +      | -      | 14:0_11:0_18:0 | MUS +    | -      |
|        |          |                                                |      | 15:0_11:0_17:0 | PaUMa +    | -      | 15:0_11:0_17:0 | PaUMa +  | -      |
|        |          |                                                |      | 12:0_16:0_15:0 | LaPPa +    | -      | 12:0_16:0_15:0 | LaPPa +  | -      |
|        |          |                                                |      | 12:0_13:0_18:0 | LaTdS +    | -      | 12:0_13:0_18:0 | LaTdS +  | -      |
|        |          |                                                |      | 12:0_17:0_14:0 | LaMaM +    | -      | 12:0_14:0_17:0 | LaMMa +  | 298.47 |
|        |          |                                                |      | 13:0_15:0_15:0 | TdPaPa + - | -      | 15:0_13:0_15:0 | PaTdPa + | 298.35 |
|        |          |                                                |      | 14:0_13:0_16:0 | MTdP +     | -      | 13:0_14:0_16:0 | TMdP +   | -      |
|        |          |                                                |      | 17:0_13:0_13:0 | MaTdTd +   | -      | 17:0_13:0_13:0 | MaTdTd + | -      |
|        |          |                                                |      | 14:0_15:0_14:0 | MPaM       | -      | 14:0_15:0_14:0 | MPaM     | -      |
| 14.556 | 752.6792 | C <sub>46</sub> H <sub>86</sub> O <sub>6</sub> | 43:1 | 16:0_9:0_18:1  | PPgO +     | 299.98 | 9:0_16:0_18:1  | PgPO +   | -      |
|        |          |                                                |      | 15:0_10:0_18:1 | PaCaO +    | 296.07 | 15:0_10:0_18:1 | PaCaO +  | 296.07 |
|        |          |                                                |      | 10:0_16:0_17:1 | CaPMo +    | 296.63 | 10:0_17:1_16:0 | CaMoP +  | 296.49 |
|        |          |                                                |      | 17:1_12:0_14:0 | MoLaM      | 297.48 | 17:1_12:0_14:0 | MoLaM    | 297.48 |
| 13.796 | 750.663  | C <sub>46</sub> H <sub>84</sub> O <sub>6</sub> | 43:2 | 17:1_9:0_17:1  | MoPgMo +   | -      | 17:1_9:0_17:1  | MoPgMo + | -      |
|        |          |                                                |      | 18:1_7:0_18:1  | OEnO +     | -      | 18:1_7:0_18:1  | OEnO +   | -      |
|        |          |                                                |      | 9:0_16:0_18:2  | PPgL +     | -      | 16:0_9:0_18:2  | PPgL +   | 298.47 |
|        |          |                                                |      | 18:2_10:0_15:0 | LCaPa      | -      | 10:0_18:2_15:0 | CaLPa    | -      |
| 11.543 | 744.6133 | C <sub>46</sub> H <sub>78</sub> O <sub>6</sub> | 43:5 | 22:5_17:0_4:0  | DpMaBu     | 281.11 | 22:5_4:0_17:0  | DpBuMa   | 280.21 |
| 15.374 | 768.7106 | C <sub>47</sub> H <sub>90</sub> O <sub>6</sub> | 44:0 | 16:0_10:0_18:0 | PCaS +     | 302.73 | 16:0_10:0_18:0 | PCaS +   | 302.73 |
|        |          |                                                |      | 12:0_14:0_18:0 | LaMS +     | 302.25 | 12:0_14:0_18:0 | LaMS +   | 302.25 |
|        |          |                                                |      | 16:0_12:0_16:0 | PLaP +     | 303.53 | 16:0_12:0_16:0 | PLaP +   | 303.53 |
|        |          |                                                |      | 14:0_14:0_16:0 | MMP        | 310.13 | 14:0_14:0_16:0 | MMP      | 310.13 |
| 14.895 | 766.6947 | C <sub>47</sub> H <sub>88</sub> O <sub>6</sub> | 44:1 | 16:0_10:0_18:1 | PCaO +     | 309.04 | 16:0_10:0_18:1 | PCaO +   | 309.04 |



|        |          |                                                |      |                |          |        |                |          |        |
|--------|----------|------------------------------------------------|------|----------------|----------|--------|----------------|----------|--------|
| 14.347 | 764.6789 | C <sub>47</sub> H <sub>86</sub> O <sub>6</sub> | 44:2 | 12:0_14:0_18:1 | LaMO     | 302.11 | 14:0_12:0_18:1 | MLaO     | 302.05 |
|        |          |                                                |      | 16:0_10:0_18:1 | PCaO +   | 298.27 | 10:0_16:0_18:1 | CaPO +   | 298.21 |
|        |          |                                                |      | 12:0_14:0_18:2 | LaML +   | 309.04 | 12:0_14:0_18:2 | LaML +   | 309.04 |
|        |          |                                                |      | 16:1_12:0_16:1 | PoLaPo + | 298.21 | 16:1_12:0_16:1 | PoLaPo + | 298.21 |
|        |          |                                                |      | 8:0_18:1_18:1  | CyOO +   | 299.83 | 8:0_18:1_18:1  | CyOO +   | 299.83 |
| 13.711 | 762.6634 | C <sub>47</sub> H <sub>84</sub> O <sub>6</sub> | 44:3 | 10:0_18:1_16:1 | CaOPo    | 297.14 | 10:0_18:1_16:1 | CaOPo    | 297.14 |
|        |          |                                                |      | 14:0_12:0_18:3 | MLaLn +  | 298.33 | 12:0_14:0_18:3 | LaMLn +  | 295.81 |
|        |          |                                                |      | 8:0_18:2_18:1  | CyLO +   | 289.72 | 8:0_18:1_18:2  | CyOL +   | 299.83 |
|        |          |                                                |      | 10:0_16:0_18:3 | CaPLn +  | 295.44 | 10:0_16:0_18:3 | CaPLn +  | 295.44 |
|        |          |                                                |      | 16:0_10:1_18:2 | PDcL     | 289.25 | 10:1_16:0_18:2 | DcPL     | 296.09 |
| 12.646 | 760.6459 | C <sub>47</sub> H <sub>82</sub> O <sub>6</sub> | 44:4 | 8:0_18:3_18:1  | CyLnO +  | 290.38 | 8:0_18:3_18:1  | CyLnO +  | 290.38 |
|        |          |                                                |      | 8:0_18:2_18:2  | CyLL     | 292.24 | 8:0_18:2_18:2  | CyLL     | 292.24 |
| 12.05  | 758.6298 | C <sub>47</sub> H <sub>80</sub> O <sub>6</sub> | 44:5 | 6:0_16:0_22:5  | CoPDp    | -      | n.d.           | n.d.     | -      |
| 11.022 | 756.6162 | C <sub>47</sub> H <sub>78</sub> O <sub>6</sub> | 44:6 | 18:1_4:0_22:5  | OBuDp    | -      | 18:1_4:0_22:5  | OBuDp    | -      |
| 15.519 | 782.7271 | C <sub>48</sub> H <sub>92</sub> O <sub>6</sub> | 45:0 | 14:0_15:0_16:0 | MPaP +   | 304.84 | 14:0_15:0_16:0 | MPaP +   | 304.84 |
|        |          |                                                |      | 14:0_14:0_17:0 | MMMa +   | -      | 14:0_14:0_17:0 | MMMa +   | -      |
|        |          |                                                |      | 15:0_12:0_18:0 | MaLaS +  | -      | 15:0_12:0_18:0 | MaLaS +  | -      |
|        |          |                                                |      | 16:0_12:0_17:0 | PLaMa    | -      | 16:0_12:0_17:0 | PLaMa    | -      |
| 15.106 | 780.7113 | C <sub>48</sub> H <sub>90</sub> O <sub>6</sub> | 45:1 | 16:0_12:0_17:1 | PLaMo +  | 299.70 | 16:0_12:0_17:1 | PLaMo +  | 299.70 |
|        |          |                                                |      | 10:0_17:0_18:1 | CaMaO    | 303.4  | 10:0_17:0_18:1 | CaMaO    | 303.4  |
| 14.56  | 778.6946 | C <sub>48</sub> H <sub>88</sub> O <sub>6</sub> | 45:2 | 12:0_15:0_18:2 | LaPaL +  | 301.0  | 12:0_15:0_18:2 | LaPaL +  | 301.0  |
|        |          |                                                |      | 17:1_10:0_18:1 | MoCaO    | -      | 10:0_17:1_18:1 | CaMoO    | 301    |
| 14.109 | 776.6757 | C <sub>48</sub> H <sub>86</sub> O <sub>6</sub> | 45:3 | 12:0_15:0_18:3 | LaPaLn + | 496.39 | 15:0_12:0_18:3 | PaLaLn + | -      |
|        |          |                                                |      | 10:0_17:0_18:3 | CaMaLn + | -      | 10:0_18:3_17:0 | CaLnMa + | -      |
|        |          |                                                |      | 17:1_18:2_10:0 | MoLCa+   | -      | 18:2_17:1_10:0 | LMoCa+   | -      |
|        |          |                                                |      | 18:1_9:0_18:2  | OPgL     | -      | 9:0_18:1_18:2  | OPgL     | -      |
| 15.838 | 796.7417 | C <sub>49</sub> H <sub>94</sub> O <sub>6</sub> | 46:0 | 12:0_16:0_18:0 | LaPS +   | 308.90 | 16:0_12:0_18:0 | PLaS +   | 309.12 |
|        |          |                                                |      | 16:0_14:0_16:0 | PMP +    | 314.90 | 14:0_16:0_16:0 | MPP +    | 309.12 |
|        |          |                                                |      | 14:0_14:0_18:0 | MMS      | 322.88 | 14:0_14:0_18:0 | MMS      | 322.88 |
| 15.442 | 794.7262 | C <sub>49</sub> H <sub>92</sub> O <sub>6</sub> | 46:1 | 16:1_18:0_12:0 | PoSLa +  | 307.66 | 18:0_16:1_12:0 | SPoSLa + | 307.2  |
|        |          |                                                |      | 16:0_16:1_14:0 | PPoM +   | 310.16 | 16:0_16:1_14:0 | PPoM +   | 310.16 |

|        |          |                                                |      |                |         |        |                |         |        |
|--------|----------|------------------------------------------------|------|----------------|---------|--------|----------------|---------|--------|
|        |          |                                                |      | 14:0_14:0_18:1 | MMO +   | 314.87 | 14:0_14:0_18:1 | MMO +   | 314.87 |
|        |          |                                                |      | 16:0_12:0_18:1 | PLaO +  | 305.79 | 16:0_12:0_18:1 | PLaO +  | 305.79 |
|        |          |                                                |      | 10:0_18:0_18:1 | CaSO    | 307.25 | 10:0_18:0_18:1 | CaSO    | 307.25 |
| 14.981 | 792.7103 | C <sub>49</sub> H <sub>90</sub> O <sub>6</sub> | 46:2 | 14:0_14:0_18:2 | MML +   | 308.77 | 14:0_14:0_18:2 | MML +   | 308.77 |
|        |          |                                                |      | 10:0_18:1_18:1 | CaOO +  | 313.38 | 10:0_18:1_18:1 | CaOO +  | 313.38 |
|        |          |                                                |      | 12:0_16:0_18:2 | LaPL    | 305.04 | 16:0_12:0_18:2 | PLaL    | 304.89 |
| 14.469 | 790.6946 | C <sub>49</sub> H <sub>88</sub> O <sub>6</sub> | 46:3 | 10:0_18:2_18:1 | CaLO    | 302.29 | 18:1_10:0_18:2 | OCaL    | 303.45 |
| 13.858 | 788.679  | C <sub>49</sub> H <sub>86</sub> O <sub>6</sub> | 46:4 | 18:1_10:0_18:3 | OCaLn + | 300.21 | 10:0_18:1_18:3 | OCaLn + | 299.51 |
|        |          |                                                |      | 10:0_18:2_18:2 | CaLnLn  | 300.21 | 10:0_18:2_18:2 | CaLnLn  | 300.21 |
| 13.18  | 786.6612 | C <sub>49</sub> H <sub>84</sub> O <sub>6</sub> | 46:5 | 16:0_8:0_22:5  | PCyDp + | 292.84 | 16:0_8:0_22:5  | PCyDp + | 292.84 |
|        |          |                                                |      | 10:0_14:0_22:5 | CaMDp   | 295.76 | 10:0_14:0_22:5 | CaMDp+  | 295.76 |
| 12.496 | 784.6454 | C <sub>49</sub> H <sub>82</sub> O <sub>6</sub> | 46:6 | n.d.           | n.d.    | -      | 22:5_18:1_6:0  | DpOCa   | 289.79 |
| 16.025 | 810.7571 | C <sub>50</sub> H <sub>96</sub> O <sub>6</sub> | 47:0 | 15:0_14:0_18:0 | PaMS +  | -      | n.d.           | n.d.    | -      |
|        |          |                                                |      | 16:0_14:0_17:0 | PMMa +  | -      | n.d.           | n.d.    | -      |
|        |          |                                                |      | 15:0_16:0_16:0 | PaPP    | -      | 15:0_14:0_18:0 | PaMS +  | -      |
| 15.65  | 808.7417 | C <sub>50</sub> H <sub>94</sub> O <sub>6</sub> | 47:1 | 14:0_17:1_16:0 | MMoP    | 311.52 | 14:0_16:0_17:1 | MPMo    | 310.85 |
| 15.162 | 806.7252 | C <sub>50</sub> H <sub>92</sub> O <sub>6</sub> | 47:2 | 17:1_12:0_18:1 | MoLaO   | -      | 12:0_17:1_18:1 | LaMoO   | -      |
| 15.24  | 806.7254 | C <sub>50</sub> H <sub>92</sub> O <sub>6</sub> | 47:2 | 14:0_16:0_18:2 | MPL     | -      | 14:0_16:0_18:2 | MPL     | -      |
| 14.757 | 804.7072 | C <sub>50</sub> H <sub>90</sub> O <sub>6</sub> | 47:3 | 17:1_12:0_18:2 | MoLaL + | -      | 17:1_12:0_18:2 | MoLaL   | -      |
|        |          |                                                |      | 14:0_15:0_18:3 | MPaLn + | -      | 15:0_14:0_18:3 | PaMLn + | 265.13 |
|        |          |                                                |      | 12:0_17:0_18:3 | LaMaLn  | -      | 17:0_12:0_18:3 | LaMaLn  | -      |
| 16.257 | 824.7728 | C <sub>51</sub> H <sub>98</sub> O <sub>6</sub> | 48:0 | 16:0_14:0_18:0 | PMS     | 315.68 | 16:0_14:0_18:0 | PMS     | 315.68 |
| 15.883 | 822.7571 | C <sub>51</sub> H <sub>96</sub> O <sub>6</sub> | 48:1 | 18:1_14:0_16:0 | OMP     | 314.62 | 18:1_14:0_16:0 | OMP     | 314.62 |
| 15.512 | 820.7417 | C <sub>51</sub> H <sub>94</sub> O <sub>6</sub> | 48:2 | 18:1_12:0_18:1 | OLaO +  | 314.26 | 18:1_12:0_18:1 | OLaO +  | 314.26 |
|        |          |                                                |      | 16:0_18:2_14:0 | PLM +   | 319.39 | 16:0_14:0_18:2 | PML +   | 311.56 |
|        |          |                                                |      | 18:1_14:0_16:1 | OMPo +  | 312.66 | 14:0_16:1_18:1 | MPoO +  | 312.66 |
|        |          |                                                |      | 16:0_16:1_16:1 | PPoPo   | 311.56 | 16:0_16:1_16:1 | PPoPo   | 311.56 |
| 15.11  | 818.7257 | C <sub>51</sub> H <sub>92</sub> O <sub>6</sub> | 48:3 | 18:1_12:0_18:2 | OLaL    | 306.76 | 18:1_12:0_18:2 | OLaL    | 306.76 |
| 14.519 | 816.71   | C <sub>51</sub> H <sub>90</sub> O <sub>6</sub> | 48:4 | 12:0_20:4_16:0 | LaAoP + | 307.15 | 12:0_20:4_16:0 | LaAoP + | 307.15 |
|        |          |                                                |      | 14:0_20:4_14:0 | MAoM    | 308.55 | 14:0_20:4_14:0 | MAoM    | 308.55 |

|        |          |                                                 |      |                |         |        |                |          |        |
|--------|----------|-------------------------------------------------|------|----------------|---------|--------|----------------|----------|--------|
| 14.117 | 814.6932 | C <sub>51</sub> H <sub>88</sub> O <sub>6</sub>  | 48:5 | 10:0_16:0_22:5 | CaPDp   | -      | 10:0_22:5_16:0 | CaDpP    | -      |
| 13.933 | 812.6782 | C <sub>51</sub> H <sub>86</sub> O <sub>6</sub>  | 48:6 | n.d.           | n.d.    | -      | 16:0_10:0_22:6 | PCaDHA + | -      |
| 16.408 | 838.7885 | C <sub>52</sub> H <sub>100</sub> O <sub>6</sub> | 49:0 | 17:0_14:0_18:0 | MaMS +  | -      | 17:0_14:0_18:0 | MaMS +   | -      |
|        |          |                                                 |      | 16:0_15:0_18:0 | PPaO +  | -      | 16:0_15:0_18:0 | PPaO +   | -      |
|        |          |                                                 |      | 17:0_15:0_17:0 | MaPaMa+ | -      | 17:0_15:0_17:0 | MaPaMa + | -      |
|        |          |                                                 |      | 16:0_17:0_16:0 | PMaP    | -      | 16:0_17:0_16:0 | PMaP     | -      |
| 16.07  | 836.7728 | C <sub>52</sub> H <sub>98</sub> O <sub>6</sub>  | 49:1 | 14:0_18:1_17:0 | MOMa +  | 318.15 | 14:0_18:1_17:0 | MOMa +   | 318.15 |
|        |          |                                                 |      | 15:0_17:1_17:0 | PaMoMa+ | 323.09 | 15:0_17:1_17:0 | PaMoMa+  | 323.09 |
|        |          |                                                 |      | 15:0_18:1_16:0 | PaOP    | 316.97 | 16:0_15:0_18:1 | PPaO     | 316.67 |
| 15.719 | 834.757  | C <sub>52</sub> H <sub>96</sub> O <sub>6</sub>  | 49:2 | 16:0_18:2_15:0 | PLPa +  | 316.69 | 15:0_16:0_18:2 | PaPL +   | -      |
|        |          |                                                 |      | 14:0_17:0_18:2 | MMaL +  | -      | 14:0_17:0_18:2 | MMaL +   | -      |
|        |          |                                                 |      | 15:0_16:1_18:1 | PaPoO + | -      | 15:0_16:1_18:1 | PaPoO +  | -      |
|        |          |                                                 |      | 17:1_16:1_16:0 | MoPoP + | -      | 17:1_16:1_16:0 | MoPoP +  | -      |
|        |          |                                                 |      | 17:1_17:1_15:0 | MoMoPa+ | -      | 17:1_17:1_15:0 | MoMoPa + | -      |
|        |          |                                                 |      | 16:1_17:0_16:1 | PoMaPo  | -      | 16:1_16:1_17:0 | PoPoMa   | -      |
| 15.336 | 832.7397 | C <sub>52</sub> H <sub>94</sub> O <sub>6</sub>  | 49:3 | 15:0_16:1_18:2 | PaPoL + | 273.20 | 15:0_16:1_18:2 | PaPoL +  | 273.20 |
|        |          |                                                 |      | 17:1_18:2_14:0 | MoLM +  | -      | 17:1_18:2_14:0 | MoLM +   | -      |
|        |          |                                                 |      | 13:0_18:2_18:1 | TdLO +  | -      | 18:2_13:0_18:1 | LTdO +   | 317.31 |
|        |          |                                                 |      | 14:0_18:3_17:0 | MLnMa + | -      | 17:0_14:0_18:3 | MaMLn +  | -      |
|        |          |                                                 |      | 16:0_15:0_18:3 | PPaLn   | -      | 16:0_15:0_18:3 | PPaLn    | -      |
| 16.578 | 852.8042 | C <sub>53</sub> H <sub>102</sub> O <sub>6</sub> | 50:0 | 16:0_16:0_18:0 | PPS +   | 325.62 | 16:0_16:0_18:0 | PPS +    | 325.62 |
|        |          |                                                 |      | 16:0_20:0_14:0 | PAM +   | 321.32 | 16:0_14:0_20:0 | PMA +    | 323.19 |
|        |          |                                                 |      | 18:0_14:0_18:0 | SMS     | 324.11 | 18:0_14:0_18:0 | SMS      | 324.11 |
| 16.275 | 850.7885 | C <sub>53</sub> H <sub>100</sub> O <sub>6</sub> | 50:1 | 18:0_14:0_18:1 | SMO +   | 321.35 | 18:0_14:0_18:1 | SMO +    | 321.35 |
|        |          |                                                 |      | 16:0_18:1_16:0 | POP     | 325.41 | 16:0_16:0_18:1 | PPO      | 320.79 |
| 15.945 | 848.7729 | C <sub>53</sub> H <sub>98</sub> O <sub>6</sub>  | 50:2 | 18:1_14:0_18:1 | OMO +   | 319.86 | 18:1_14:0_18:1 | OMO +    | 319.86 |
|        |          |                                                 |      | 16:0_16:1_18:1 | PPoO +  | 324.96 | 16:0_16:1_18:1 | PPoO +   | 324.96 |
|        |          |                                                 |      | 16:0_16:0_18:2 | PPL     | 318.78 | 16:0_16:0_18:2 | PPL      | 318.78 |
| 15.601 | 846.7575 | C <sub>53</sub> H <sub>96</sub> O <sub>6</sub>  | 50:3 | 16:0_16:1_18:2 | PPoL +  | 317.91 | 16:0_16:1_18:2 | PPoL +   | 317.91 |
|        |          |                                                 |      | 18:1_18:2_14:0 | OLM     | 323.37 | 18:1_18:2_14:0 | OLM      | 323.37 |
| 15.198 | 844.7417 | C <sub>53</sub> H <sub>94</sub> O <sub>6</sub>  | 50:4 | 18:1_14:0_18:3 | OMLn +  | 314.36 | 18:1_14:0_18:3 | OMLn +   | 314.36 |

|        |          |                                                 |      |                |          |        |                |          |        |
|--------|----------|-------------------------------------------------|------|----------------|----------|--------|----------------|----------|--------|
|        |          |                                                 |      | 18:2_14:0_18:2 | LML +    | 312.21 | 14:0_18:2_18:2 | MLL +    | 314.31 |
|        |          |                                                 |      | 14:0_20:4_16:0 | MPAo     | 322.89 | 14:0_20:4_16:0 | MAoP     | 322.89 |
| 14.726 | 842.7213 | C <sub>53</sub> H <sub>92</sub> O <sub>6</sub>  | 50:5 | 14:0_22:5_14:0 | MDpM +   | -      | 14:0_22:5_14:0 | MDpM +   | -      |
|        |          |                                                 |      | 16:0_12:0_22:5 | PLaDp    | -      | 16:0_12:0_22:5 | PLaDp    | -      |
| 16.734 | 866.8195 | C <sub>54</sub> H <sub>104</sub> O <sub>6</sub> | 51:0 | 16:0_17:0_18:0 | PMaS     | 323.08 | 17:0_16:0_18:0 | MaPS     | 322.68 |
| 16.443 | 864.8041 | C <sub>54</sub> H <sub>102</sub> O <sub>6</sub> | 51:1 | 16:0_17:0_18:1 | PMaO +   | 323.47 | 16:0_17:0_18:1 | PMaO +   | 323.47 |
|        |          |                                                 |      | 18:1_15:0_18:0 | OPaS     | 329.25 | 18:1_15:0_18:0 | OPaS     | 329.25 |
| 16.124 | 862.7883 | C <sub>54</sub> H <sub>100</sub> O <sub>6</sub> | 51:2 | 15:0_18:1_18:1 | PaOO +   | 320.98 | 15:0_18:1_18:1 | PaOO +   | 320.98 |
|        |          |                                                 |      | 16:0_17:1_18:1 | PMoO     | 326.02 | 16:0_17:1_18:1 | PMoO     | 326.02 |
| 15.788 | 860.7717 | C <sub>54</sub> H <sub>98</sub> O <sub>6</sub>  | 51:3 | 16:1_17:0_18:2 | PoMaL +  | 322.53 | 16:1_17:0_18:2 | PoMaL +  | 322.53 |
|        |          |                                                 |      | 18:2_16:0_17:1 | LPMo +   | 319.61 | 18:2_16:0_17:1 | LPMo +   | 319.61 |
|        |          |                                                 |      | 18:2_16:0_18:1 | LPO +    | -      | 18:2_16:0_18:1 | LPO +    | -      |
|        |          |                                                 |      | 17:0_16:0_18:3 | MaPLn    | 322.53 | 16:0_17:0_18:3 | PMaLn    | 321.24 |
| 15.507 | 858.7533 | C <sub>54</sub> H <sub>96</sub> O <sub>6</sub>  | 51:4 | 16:0_17:1_18:3 | PMoLn +  | 325.43 | 16:0_17:1_18:3 | PMoLn +  | 325.43 |
|        |          |                                                 |      | 18:3_15:0_18:1 | LnPaO +  | -      | 18:3_15:0_18:1 | LnPaO +  | -      |
|        |          |                                                 |      | 18:2_18:2_15:0 | LLPa     | 320.98 | 18:2_15:0_18:2 | LPaL     | 323.19 |
| 16.896 | 880.8355 | C <sub>55</sub> H <sub>106</sub> O <sub>6</sub> | 52:0 | 16:0_18:0_18:0 | PSS      | 326.8  | 16:0_18:0_18:0 | PSS      | 326.8  |
| 16.648 | 878.8197 | C <sub>55</sub> H <sub>104</sub> O <sub>6</sub> | 52:1 | 16:0_18:0_18:1 | PSO +    | 330.55 | 16:0_18:0_18:1 | PSO +    | 330.55 |
|        |          |                                                 |      | 18:0_16:1_18:0 | SPoS     | 326.24 | 18:0_16:1_18:0 | SPoS     | 326.24 |
| 16.324 | 876.804  | C <sub>55</sub> H <sub>102</sub> O <sub>6</sub> | 52:2 | 16:0_18:2_18:0 | PLO +    | 329.70 | 16:0_18:2_18:0 | PLO +    | 329.70 |
|        |          |                                                 |      | 18:1_16:0_18:1 | OPO      | 324.67 | 18:1_16:0_18:1 | OPO      | 324.67 |
| 16.051 | 874.7883 | C <sub>55</sub> H <sub>100</sub> O <sub>6</sub> | 52:3 | 16:0_18:2_18:1 | PLO      | 329.64 | 18:2_16:0_18:1 | LPO      | 322.77 |
| 15.695 | 872.7728 | C <sub>55</sub> H <sub>98</sub> O <sub>6</sub>  | 52:4 | 18:1_16:0_18:3 | OPLn +   | 321.74 | 18:1_16:0_18:3 | OPLn +   | 321.74 |
|        |          |                                                 |      | 16:0_18:2_18:2 | PLL      | 327.54 | 16:0_18:2_18:2 | PLL      | 327.54 |
| 15.305 | 870.7548 | C <sub>55</sub> H <sub>96</sub> O <sub>6</sub>  | 52:5 | n.d.           | n.d.     | -      | 14:0_16:0_22:5 | MPDp +   | -      |
|        |          |                                                 |      | 14:0_20:4_18:1 | MAoO     | -      | n.d.           | n.d.     | -      |
| 15.109 | 868.7393 | C <sub>55</sub> H <sub>94</sub> O <sub>6</sub>  | 52:6 | 18:1_14:0_20:5 | OMEp +   | -      | 18:1_14:0_20:5 | OMEp +   | -      |
|        |          |                                                 |      | 14:0_20:4_18:2 | MAoL     | 325.66 | 14:0_18:2_20:4 | MLAo     | 323.26 |
| 17.03  | 894.8488 | C <sub>56</sub> H <sub>108</sub> O <sub>6</sub> | 53:0 | 23:0_14:0_16:0 | TaMP +   | -      | 23:0_14:0_16:0 | TaMP +   | -      |
|        |          |                                                 |      | 14:0_21:0_18:0 | MHeS +   | -      | 21:0_14:0_18:0 | HeMS +   | 324    |
|        |          |                                                 |      | 15:0_15:0_23:0 | PaPaTa + | -      | 15:0_15:0_23:0 | PaPaTa + | -      |

|        |          |                                                 |      |                |          |        |                |          |        |
|--------|----------|-------------------------------------------------|------|----------------|----------|--------|----------------|----------|--------|
|        |          |                                                 |      | 17:0_15:0_21:0 | MaPaHe + | -      | 17:0_15:0_21:0 | MaPaHe + | -      |
|        |          |                                                 |      | 16:0_21:0_16:0 | PHeP +   | -      | 21:0_16:0_16:0 | HePP +   | 329.21 |
|        |          |                                                 |      | 16:0_19:0_18:0 | PNoS +   | 324.78 | 19:0_16:0_18:0 | NoPS +   | -      |
|        |          |                                                 |      | 17:0_18:0_18:0 | MaSS +   | -      | 18:0_17:0_18:0 | SMaS +   | -      |
|        |          |                                                 |      | 19:0_17:0_17:0 | NoMaMa   | -      | 19:0_17:0_17:0 | NoMaMa   | -      |
| 16.771 | 892.8351 | C <sub>56</sub> H <sub>106</sub> O <sub>6</sub> | 53:1 | 16:0_18:1_19:0 | PONo +   | 332.32 | 16:0_18:1_19:0 | PONo +   | 332.32 |
|        |          |                                                 |      | 17:0_18:1_18:0 | MaOS     | 328.62 | 17:0_18:1_18:0 | MaOS     | 328.62 |
| 16.484 | 890.8196 | C <sub>56</sub> H <sub>104</sub> O <sub>6</sub> | 53:2 | 18:1_17:0_18:1 | OMaO +   | 326.53 | 18:1_17:0_18:1 | OMaO +   | 326.53 |
|        |          |                                                 |      | 18:0_17:0_18:2 | SMaL     | -      | 17:0_18:2_18:0 | MaLS     | 329.43 |
| 16.176 | 888.8034 | C <sub>56</sub> H <sub>102</sub> O <sub>6</sub> | 53:3 | 17:0_18:1_18:2 | MaOL +   | -      | 18:1_17:0_18:2 | OMaL +   | -      |
|        |          |                                                 |      | 18:1_17:1_18:1 | OMoO     | 332.23 | 17:1_18:1_18:1 | MoOO     | -      |
| 15.879 | 886.7844 | C <sub>56</sub> H <sub>100</sub> O <sub>6</sub> | 53:4 | 17:1_18:1_18:2 | MoOL +   | -      | 18:1_17:1_18:2 | OMoL +   | -      |
|        |          |                                                 |      | 18:1_17:0_18:3 | OMaLn    | -      | 18:1_17:0_18:3 | OMaLn    | -      |
| 17.178 | 908.8659 | C <sub>57</sub> H <sub>110</sub> O <sub>6</sub> | 54:0 | 16:0_20:0_18:0 | PAS +    | -      | 16:0_20:0_18:0 | PAS +    | -      |
| 16.929 | 906.8509 | C <sub>57</sub> H <sub>108</sub> O <sub>6</sub> | 54:1 | 18:0_18:1_18:0 | SOS +    | 332.48 | 18:1_18:0_18:0 | OSS +    | 331.6  |
|        |          |                                                 |      | 18:1_16:0_20:0 | OPA      | 337.52 | 18:1_20:0_16:0 | OAP      | -      |
| 16.665 | 904.8355 | C <sub>57</sub> H <sub>106</sub> O <sub>6</sub> | 54:2 | 18:1_18:0_18:1 | OSO +    | 330.07 | 18:1_18:1_18:0 | OOS +    | 329.57 |
| 16.373 | 902.8197 | C <sub>57</sub> H <sub>104</sub> O <sub>6</sub> | 54:3 | 18:1_18:1_18:1 | OOO +    | 327.45 | 18:1_18:1_18:1 | OOO +    | 327.45 |
| 16.077 | 900.8039 | C <sub>57</sub> H <sub>102</sub> O <sub>6</sub> | 54:4 | 18:1_18:1_18:2 | OOL +    | 329.34 | 18:1_18:1_18:2 | OOL +    | 329.34 |
| 15.371 | 896.7711 | C <sub>57</sub> H <sub>98</sub> O <sub>6</sub>  | 54:6 | 18:1_16:0_20:5 | OPEp +   | 303.53 | 18:1_16:0_20:5 | OPEp +   | 303.53 |
| 15.03  | 894.7548 | C <sub>57</sub> H <sub>96</sub> O <sub>6</sub>  | 54:7 | 18:2_16:0_20:5 | LPEp +   | -      | n.d.           | n.d.     | -      |
| 17.317 | 922.8784 | C <sub>58</sub> H <sub>112</sub> O <sub>6</sub> | 55:0 | n.d.           | n.d.     | -      | 14:0_18:0_23:0 | MSTa +   | -      |
|        |          |                                                 |      | n.d.           | n.d.     | -      | 16:0_21:0_18:0 | PHeS +   | -      |
|        |          |                                                 |      | 16:0_23:0_16:0 | PTaP     | -      | 16:0_23:0_16:0 | PTaP     | -      |
| 17.069 | 920.8647 | C <sub>58</sub> H <sub>110</sub> O <sub>6</sub> | 55:1 | n.d.           | n.d.     | -      | 21:0_16:0_18:1 | HePO +   | -      |
|        |          |                                                 |      | n.d.           | n.d.     | -      | 16:0_23:1_16:0 | PTeP     | -      |
| 16.812 | 918.8488 | C <sub>58</sub> H <sub>108</sub> O <sub>6</sub> | 55:2 | 18:0_19:1_18:1 | SNeO +   | -      | 18:0_18:1_19:1 | SONe +   | 290.02 |
|        |          |                                                 |      | 18:1_18:1_19:0 | OONo     | -      | 18:1_19:0_18:1 | ONoO     | -      |
| 16.526 | 916.8325 | C <sub>58</sub> H <sub>106</sub> O <sub>6</sub> | 55:3 | 18:1_18:1_19:1 | OONe     | 291.18 | 18:1_18:1_19:1 | OONe     | 291.18 |
| 17.445 | 936.8934 | C <sub>59</sub> H <sub>114</sub> O <sub>6</sub> | 56:0 | 26:0_14:0_16:0 | HxMP +   | -      | 26:0_14:0_16:0 | HxMP +   | -      |
|        |          |                                                 |      | 18:0_14:0_24:0 | SMLi +   | -      | 18:0_24:0_14:0 | SLiM +   | 289.21 |
|        |          |                                                 |      | 16:0_22:0_18:0 | PBeS +   | -      | 22:0_16:0_18:0 | BePS +   | -      |
|        |          |                                                 |      | 24:0_16:0_16:0 | LiPP     | -      | 24:0_16:0_16:0 | LiPP     | -      |

|        |          |                                                 |      |                |         |        |                |         |        |
|--------|----------|-------------------------------------------------|------|----------------|---------|--------|----------------|---------|--------|
| 17.205 | 934.8812 | C <sub>59</sub> H <sub>112</sub> O <sub>6</sub> | 56:1 | 22:0_16:0_18:1 | BePO +  | -      | 22:0_16:0_18:1 | BePO +  | -      |
|        |          |                                                 |      | 16:0_16:1_24:0 | PPoLi + | -      | 16:0_16:1_24:0 | PPoLi + | -      |
|        |          |                                                 |      | 18:1_20:0_18:0 | OAS +   | -      | 18:1_20:0_18:0 | OAS +   | -      |
|        |          |                                                 |      | 18:0_24:1_18:0 | STS +   | -      | 18:0_24:1_18:0 | STS +   | -      |
|        |          |                                                 |      | 16:0_20:0_20:1 | PAE +   | -      | 16:0_20:1_20:0 | PEA +   | -      |
|        |          |                                                 |      | 16:0_16:0_24:1 | PPT     | -      | 16:0_16:0_24:1 | PPT     | -      |
| 16.969 | 932.8649 | C <sub>59</sub> H <sub>110</sub> O <sub>6</sub> | 56:2 | 16:0_20:1_20:1 | PEE +   | -      | 16:0_20:1_20:1 | PEE +   | -      |
|        |          |                                                 |      | 18:0_20:1_18:1 | SEO +   | -      | 18:0_20:1_18:1 | SEO +   | -      |
|        |          |                                                 |      | 16:0_22:1_18:1 | PDoO    | -      | 18:1_16:0_22:1 | OPDo    | -      |
| 16.714 | 930.8471 | C <sub>59</sub> H <sub>108</sub> O <sub>6</sub> | 56:3 | 18:1_20:1_18:1 | OEO     | -      | 18:1_20:1_18:1 | OEO     | -      |
| 16.472 | 928.8316 | C <sub>59</sub> H <sub>106</sub> O <sub>6</sub> | 56:4 | 18:0_18:1_20:3 | SOEt +  | -      | 18:0_18:1_20:3 | SOEt +  | -      |
|        |          |                                                 |      | 16:0_18:1_22:3 | PODe    | -      | 16:0_18:1_22:3 | PODe    | -      |
| 16.26  | 926.8154 | C <sub>59</sub> H <sub>104</sub> O <sub>6</sub> | 56:5 | 16:0_22:4_18:1 | PDtO    | -      | 16:0_22:4_18:1 | PDtO    | -      |
| 15.945 | 924.8025 | C <sub>59</sub> H <sub>102</sub> O <sub>6</sub> | 56:6 | 16:0_18:1_22:5 | PODp    | -      | 18:1_16:0_22:5 | OPDp    | -      |
| 17.335 | 948.8949 | C <sub>60</sub> H <sub>114</sub> O <sub>6</sub> | 57:1 | 18:0_21:0_18:1 | SHeO +  | -      | 18:1_18:0_21:0 | OSHe +  | -      |
|        |          |                                                 |      | 16:0_25:1_16:0 | PPbP +  | -      | 16:0_25:1_16:0 | PPbP +  | -      |
|        |          |                                                 |      | n.d.           | n.d.    | -      | 16:0_23:1_18:0 | PTeS +  | -      |
|        |          |                                                 |      | 23:0_16:0_18:1 | TaPO    | -      | 23:0_16:0_18:1 | TaPO    | -      |
| 17.455 | 962.9104 | C <sub>61</sub> H <sub>116</sub> O <sub>6</sub> | 58:1 | 18:1_16:0_24:0 | OPLi +  | -      | 18:1_16:0_24:0 | OPLi +  | -      |
|        |          |                                                 |      | 18:1_18:0_22:0 | OSBe    | -      | n.d.           | n.d.    | -      |
| 17.235 | 960.894  | C <sub>61</sub> H <sub>114</sub> O <sub>6</sub> | 58:2 | 16:0_24:1_18:1 | PTO     | 300.51 | 16:0_24:1_18:1 | PTO     | 300.51 |
| 15.983 | 950.8159 | C <sub>61</sub> H <sub>104</sub> O <sub>6</sub> | 58:7 | n.d.           | n.d.    | -      | 18:1_18:1_22:5 | OOD     | -      |
| 17.578 | 976.9279 | C <sub>62</sub> H <sub>118</sub> O <sub>6</sub> | 59:1 | 18:1_16:0_25:0 | OPPc    | -      | n.d.           | n.d.    | -      |

**Table S4.** List of TAG concentrations.

| <b>TAG</b> | <b>Sheep</b>   | <b>μmol</b>        | <b>Goat</b>    | <b>μmol</b>    |
|------------|----------------|--------------------|----------------|----------------|
| 36:1       | 18:1_4:0_14:0  | 3840.12±192.00     | 18:1_14:0_4:0  | 1199.1±59.96   |
| 36:3       | 14:0_4:0_18:3  | 623.7±31.19        | 14:0_4:0_18:3  | 0.16±0.01      |
| 37:0       | 17:0_14:0_6:0  | 200.96±10.05       | 14:0_17:0_6:0  | 4.39±0.22      |
| 37:0       | 16:0_17:0_4:0  | 327.32±16.37       | 16:0_17:0_4:0  | 5.08±0.25      |
| 37:0       | 17:0_10:0_10:0 | 158.51±7.93        | 17:0_10:0_10:0 | 0.87±0.04      |
| 37:1       | 16:0_4:0_17:1  | 269.79±13.49       | 16:0_4:0_17:1  | 9.16±0.46      |
| 37:2       | 15:0_4:0_18:2  | 390.4±19.52        | 15:0_4:0_18:2  | 5.16±0.26      |
| 37:2       | 4:0_16:1_17:1  | 121.25±6.06        | 4:0_17:1_16:1  | 1.45±0.07      |
| 38:1       | 16:0_18:1_4:0  | 248259.32±12412.97 | 16:0_18:1_4:0  | 3235.88±161.79 |
| 38:2       | 16:0_4:0_18:2  | 1378.2±68.91       | 4:0_16:0_18:2  | 727.26±36.36   |
| 38:3       | 16:0_4:0_18:3  | 1111.25±55.56      | 4:0_16:0_18:3  | 10.87±0.54     |
| 38:4       | 16:1_4:0_18:3  | 59.10±2.96         | 4:0_16:1_18:3  | 0.79±0.04      |
| 39:0       | 17:0_4:0_18:0  | 368.84±18.44       | 17:0_4:0_18:0  | 3.42±0.17      |
| 39:0       | 14:0_10:0_15:0 | 119.04±5.95        | 14:0_10:0_15:0 | 1.63±0.08      |
| 39:0       | 10:0_12:0_17:0 | 111.76±5.59        | 10:0_17:0_12:0 | 1.18±0.06      |
| 39:0       | 6:0_17:0_16:0  | 127.3±6.37         | 17:0_6:0_16:0  | 1.75±0.09      |
| 39:0       | 16:0_10:0_18:0 | 162.29±8.11        | 16:0_18:0_10:0 | 0.98±0.05      |
| 39:0       | 16:0_8:0_15:0  | 137.13±6.86        | 8:0_16:0_15:0  | 1.89±0.09      |

|      |                |                  |                |            |
|------|----------------|------------------|----------------|------------|
| 39:0 | 14:0_8:0_17:0  | 73.01±3.65       | 8:0_17:0_14:0  | 2.18±0.11  |
| 39:1 | 8:0_14:0_17:1  | 72.49±3.62       | 8:0_14:0_17:1  | 2.13±0.11  |
| 39:3 | 17:1_4:0_18:2  | 171.39±8.57      | 4:0_18:2_17:1  | 3.04±0.15  |
| 39:3 | 17:0_4:0_18:3  | 87.22±4.36       | 17:0_4:0_18:3  | 1.64±0.08  |
| 39:3 | 4:0_17:2_18:1  | 38.16±1.91       | 4:0_18:1_17:2  | 0.33±0.02  |
| 40:0 | 12:0_12:0_16:0 | 275.70±13.79     | 12:0_16:0_12:0 | 1.37±0.07  |
| 40:0 | 16:0_14:0_10:0 | 583.88±29.19     | 14:0_16:0_10:0 | 6.61±0.33  |
| 40:0 | 18:0_12:0_10:0 | 219.88±10.99     | 18:0_12:0_10:0 | 3.25±0.16  |
| 40:1 | 16:0_6:0_18:1  | 59328.28±2966.41 | 16:0_6:0_18:1  | 51.06±2.55 |
| 40:1 | -              | -                | 14:0_8:0_18:1  | 12.17±0.61 |
| 40:1 | -              | -                | 12:0_10:0_18:1 | 6.25±0.31  |
| 40:2 | 18:1_4:0_18:1  | 1743.76±87.19    | 18:1_4:0_18:1  | 23.32±1.17 |
| 40:2 | 6:0_18:2_16:0  | 1549.39±77.47    | 6:0_16:0_18:2  | 9.82±0.49  |
| 40:3 | 16:0_6:0_18:3  | 189.33±9.47      | 6:0_16:0_18:3  | 1.24±0.06  |
| 40:3 | 4:0_18:1_18:2  | 518.37±25.92     | 18:1_4:0_18:2  | 14.28±0.71 |
| 40:4 | 18:1_4:0_18:3  | 936.72±46.84     | 18:1_4:0_18:3  | 8.63±0.43  |
| 40:4 | 4:0_18:2_18:2  | 231.46±11.57     | 4:0_18:2_18:2  | 1.85±0.09  |
| 40:5 | 4:0_18:2_18:3  | 367.43±18.37     | 18:2_4:0_18:3  | 5.62±0.28  |
| 41:0 | 10:0_14:0_17:0 | 68.61±3.43       | 10:0_14:0_17:0 | 3.84±0.19  |
| 41:0 | 15:0_10:0_16:0 | 125.14±6.26      | 15:0_10:0_16:0 | 6.79±0.34  |
| 41:0 | 14:0_12:0_15:0 | 41.96±2.1        | 14:0_12:0_15:0 | 2.55±0.13  |
| 41:0 | 12:0_12:0_17:0 | 36.66±1.83       | 12:0_12:0_17:0 | 1.14±0.06  |



|      |                |              |                |            |
|------|----------------|--------------|----------------|------------|
| 41:1 | 12:0_12:0_17:1 | 32.93±1.65   | 12:0_12:0_17:1 | 0.46±0.02  |
| 41:2 | 17:0_6:0_18:2  | 329.05±16.45 | 6:0_17:0_18:2  | 2.10±0.10  |
| 41:2 | 17:1_6:0_18:1  | 157.56±7.88  | -              | -          |
| 41:2 | -              | -            | 8:0_15:0_18:2  | 1.56±0.08  |
| 42:0 | 16:0_12:0_14:0 | 965.81±48.29 | 16:0_12:0_14:0 | 10.77±0.54 |
| 42:0 | 10:0_12:0_18:0 | 659.74±32.98 | 10:0_12:0_18:0 | 7.6±0.38   |
| 42:0 | 16:0_14:0_18:0 | 571.54±28.58 | 16:0_14:0_18:0 | 8.6±0.43   |
| 42:1 | 10:0_14:0_18:1 | 622.04±31.1  | 10:0_14:0_18:1 | 10.5±0.53  |
| 42:1 | 8:0_18:1_16:0  | 555.14±27.76 | 16:0_8:0_18:1  | 13.09±0.65 |
| 42:2 | 18:1_18:1_6:0  | 347.77±17.39 | 18:1_18:1_6:0  | 1.99±0.1   |
| 42:2 | -              | -            | 10:0_14:0_18:2 | 0.8±0.04   |
| 42:2 | 16:0_8:0_18:2  | 145.22±7.26  | 16:0_8:0_18:2  | 1.34±0.07  |
| 42:3 | 18:1_6:0_18:2  | 281.86±14.09 | 18:1_6:0_18:2  | 4.79±0.24  |
| 42:3 | 14:0_10:0_18:3 | 102.21±5.11  | 10:0_14:0_18:3 | 2.94±0.15  |
| 42:4 | 18:2_18:2_6:0  | 206.6±10.33  | 18:2_18:2_6:0  | 3.42±0.17  |
| 42:4 | 18:1_6:0_18:3  | 288.27±14.41 | 18:1_6:0_18:3  | 8.24±0.41  |
| 42:5 | 16:0_4:0_22:5  | 276.93±13.84 | 16:0_4:0_22:5  | 5.17±0.26  |
| 42:6 | 4:0_18:2_20:4  | 40.64±2.03   | 18:2_4:0_20:4  | 1.61±0.06  |
| 43:0 | 10:0_18:0_15:0 | 141.97±7.1   | 10:0_15:0_18:0 | 4.31±0.22  |
| 43:0 | 16:0_17:0_10:0 | 204.9±10.25  | 16:0_17:0_10:0 | 4.6±0.23   |
| 43:0 | 16:0_11:0_16:0 | 96.44±4.82   | 16:0_11:0_16:0 | 1.36±0.07  |
| 43:0 | 14:0_11:0_18:0 | 94.74±4.74   | 14:0_11:0_18:0 | 1.17±0.06  |

|      |                |               |                |            |
|------|----------------|---------------|----------------|------------|
| 43:0 | 15:0_11:0_17:0 | 67.61±3.38    | 15:0_11:0_17:0 | 1.7±0.08   |
| 43:0 | 12:0_16:0_15:0 | 81.02±4.05    | 12:0_16:0_15:0 | 0.7±0.04   |
| 43:0 | 12:0_13:0_18:0 | 61.36±3.07    | 12:0_13:0_18:0 | 1.08±0.05  |
| 43:0 | 12:0_17:0_14:0 | 76.60±3.83    | 12:0_14:0_17:0 | 0.69±0.03  |
| 43:0 | 13:0_15:0_15:0 | 13.34±0.67    | 15:0_13:0_15:0 | 0.25±0.01  |
| 43:0 | 14:0_13:0_16:0 | 34.44±1.72    | 13:0_14:0_16:0 | 0.41±0.02  |
| 43:0 | 17:0_13:0_13:0 | 22.03±1.1     | 17:0_13:0_13:0 | 0.61±0.03  |
| 43:0 | 14:0_15:0_14:0 | 24.97±1.25    | 14:0_15:0_14:0 | 0.37±0.02  |
| 43:1 | 16:0_9:0_18:1  | 81.02±4.05    | 9:0_16:0_18:1  | 2.16±0.11  |
| 43:1 | 15:0_10:0_18:1 | 173.42±8.67   | 15:0_10:0_18:1 | 4.43±0.22  |
| 43:1 | 10:0_16:0_17:1 | 89.7±4.49     | 10:0_17:1_16:0 | 1.58±0.08  |
| 43:1 | 17:1_12:0_14:0 | 49.64±2.48    | 17:1_12:0_14:0 | 0.41±0.02  |
| 43:2 | 17:1_9:0_17:1  | 24.51±1.26    | 17:1_9:0_17:1  | 1.01±0.05  |
| 43:2 | 18:1_7:0_18:1  | 57.69±2.88    | 18:1_7:0_18:1  | 1.52±0.08  |
| 43:2 | 9:0_16:0_18:2  | 32.65±1.63    | 16:0_9:0_18:2  | 0.94±0.05  |
| 43:2 | 18:2_10:0_15:0 | 110.45±5.53   | 10:0_18:2_15:0 | 1.81±0.09  |
| 43:5 | 22:5_17:0_4:0  | 69.82±3.49    | 22:5_4:0_17:0  | 1.48±0.07  |
| 44:0 | 16:0_10:0_18:0 | 197.74±9.89   | 16:0_10:0_18:0 | 8.91±0.45  |
| 44:0 | 12:0_14:0_18:0 | 72.83±3.64    | 12:0_14:0_18:0 | 1.68±0.08  |
| 44:0 | 16:0_12:0_16:0 | 21.24±1.06    | 16:0_12:0_16:0 | 0.37±0.02  |
| 44:0 | 14:0_14:0_16:0 | 53.77±2.69    | 14:0_14:0_16:0 | 1.85±0.09  |
| 44:1 | 16:0_10:0_18:1 | 1469.48±73.47 | 16:0_10:0_18:1 | 14.66±0.73 |

|      |                |              |                |           |
|------|----------------|--------------|----------------|-----------|
| 44:1 | 12:0_14:0_18:1 | 370.46±18.52 | 14:0_12:0_18:1 | 7.41±0.37 |
| 44:2 | 16:0_10:0_18:1 | 193.94±9.7   | 10:0_16:0_18:1 | 3.23±0.16 |
| 44:2 | 12:0_14:0_18:2 | 131.54±6.58  | 12:0_14:0_18:2 | 2.05±0.1  |
| 44:2 | 16:1_12:0_16:1 | 21.47±1.07   | 16:1_12:0_16:1 | 0.46±0.02 |
| 44:2 | 8:0_18:1_18:1  | 140.04±7     | 8:0_18:1_18:1  | 2.41±0.12 |
| 44:2 | 10:0_18:1_16:1 | 92.71±4.64   | 10:0_18:1_16:1 | 1.84±0.09 |
| 44:3 | 14:0_12:0_18:3 | 49.68±2.48   | 12:0_14:0_18:3 | 0.39±0.02 |
| 44:3 | 8:0_18:2_18:1  | 334.48±16.72 | 8:0_18:2_18:1  | 5.57±0.28 |
| 44:3 | 10:0_16:0_18:3 | 41.58±2.08   | 10:0_16:0_18:3 | 0.36±0.02 |
| 44:3 | 16:0_10:1_18:2 | 95.38±4.77   | 10:1_16:0_18:2 | 1.57±0.08 |
| 44:4 | 8:0_18:3_18:1  | 219.79±10.99 | 8:0_18:3_18:1  | 4.9±0.24  |
| 44:4 | 8:0_18:2_18:2  | 96.73±4.84   | 8:0_18:2_18:2  | 1.56±0.08 |
| 44:5 | 16:0_6:0_22:5  | 209.64±10.48 | -              | -         |
| 44:6 | 18:1_4:0_22:5  | 131.55±6.58  | 18:1_4:0_22:5  | 2.05±0.1  |
| 45:0 | 14:0_15:0_16:0 | 174.48±8.72  | 15:0_14:0_16:0 | 1.74±0.09 |
| 45:0 | 14:0_14:0_17:0 | 148.81±7.44  | 14:0_14:0_17:0 | 2.29±0.11 |
| 45:0 | 15:0_12:0_18:0 | 126.99±6.35  | 15:0_12:0_18:0 | 3.98±0.2  |
| 45:0 | 16:0_12:0_17:0 | 163.95±8.2   | 16:0_12:0_17:0 | 3.37±0.17 |
| 45:1 | 16:0_12:0_17:1 | 55.05±2.75   | 16:0_12:0_17:1 | 0.61±0.03 |
| 45:1 | 10:0_17:0_18:1 | 160.48±8.02  | 10:0_17:0_18:1 | 1.08±0.05 |
| 45:2 | 12:0_15:0_18:2 | 16.2±0.81    | 12:0_15:0_18:2 | 0.54±0.03 |
| 45:2 | 17:1_10:0_18:1 | 43.5±2.17    | 10:0_17:1_18:1 | 1.63±0.08 |

|      |                |                  |                |              |
|------|----------------|------------------|----------------|--------------|
| 45:3 | 12:0_15:0_18:3 | 61.09±3.05       | 15:0_12:0_18:3 | 1.22±0.06    |
| 45:3 | 10:0_17:0_18:3 | 28143.37±1407.17 | 10:0_18:3_17:0 | 1.43±0.07    |
| 45:3 | 17:1_18:2_10:0 | 28124.87±1406.24 | 10:0_17:1_18:2 | 481.39±24.07 |
| 45:3 | 18:1_9:0_18:2  | 66.1±3.31        | 9:0_18:1_18:2  | 480.65±24.03 |
| 46:0 | 12:0_16:0_18:0 | 62.57±3.13       | 16:0_12:0_18:0 | 2.48±0.12    |
| 46:0 | 16:0_14:0_16:0 | 29.87±1.49       | 14:0_16:0_16:0 | 0.6±0.03     |
| 46:0 | 14:0_14:0_18:0 | 45.5±2.28        | 14:0_14:0_18:0 | 2.12±0.11    |
| 46:1 | 16:1_18:0_12:0 | 240.42±12.02     | 18:0_16:1_12:0 | 4.82±0.24    |
| 46:1 | 16:0_16:1_14:0 | 522.45±26.12     | 16:0_16:1_14:0 | 10.09±0.5    |
| 46:1 | 14:0_14:0_18:1 | 665.12±33.26     | 14:0_14:0_18:1 | 11.61±0.58   |
| 46:1 | 16:0_12:0_18:1 | 384.94±19.25     | 16:0_12:0_18:1 | 9.29±0.46    |
| 46:1 | 10:0_18:0_18:1 | 115.02±5.75      | 10:0_18:0_18:1 | 4.23±0.21    |
| 46:2 | 14:0_14:0_18:2 | 41.3±2.06        | 14:0_14:0_18:2 | 0.51±0.03    |
| 46:2 | 10:0_18:1_18:1 | 76.01±3.8        | 10:0_18:1_18:1 | 2.11±0.11    |
| 46:2 | 12:0_16:0_18:2 | 51.04±2.55       | 16:0_12:0_18:2 | 0.93±0.05    |
| 46:3 | 10:0_18:2_18:1 | 159.82±7.99      | 18:1_10:0_18:2 | 10.71±0.54   |
| 46:4 | 18:1_10:0_18:3 | 201.26±10.06     | 10:0_18:1_18:3 | 8.08±0.4     |
| 46:4 | 10:0_18:2_18:2 | 101.27±5.06      | 10:0_18:2_18:2 | 2.23±0.11    |
| 46:5 | 16:0_8:0_22:5  | 107.621±5.38     | 16:0_8:0_22:5  | 1.7±0.08     |
| 46:5 | 10:0_14:0_22:5 | 29.82±1.49       | -              | -            |
| 46:6 | -              | -                | 22:5_18:1_6:0  | 0.76±0.04    |
| 47:0 | 15:0_14:0_18:0 | 59±2.95          | -              | -            |

|      |                |                  |                |            |
|------|----------------|------------------|----------------|------------|
| 47:0 | 16:0_14:0_17:0 | 67.08±3.35       | -              | -          |
| 47:0 | 15:0_16:0_16:0 | 59.34±2.97       | 15:0_16:0_16:0 | 2.95±0.15  |
| 47:1 | 14:0_17:1_16:0 | 347.28±17.36     | 14:0_16:0_17:1 | 3.48±0.17  |
| 47:2 | 17:1_12:0_18:1 | 120.84±6.04      | 12:0_17:1_18:1 | 1.96±0.1   |
| 47:2 | 14:0_16:0_18:2 | 164.33±8.22      | 14:0_16:0_18:2 | 0.74±0.04  |
| 47:3 | 17:1_12:0_18:2 | 65.67±3.28       | 17:1_12:0_18:2 | 0.71±0.04  |
| 47:3 | 14:0_18:3_15:0 | 99.71±4.99       | 15:0_14:0_18:3 | 0.45±0.02  |
| 47:3 | 12:0_17:0_18:3 | 75.07±3.75       | 17:0_12:0_18:3 | 0.4±0.02   |
| 48:0 | 16:0_14:0_18:0 | 1332.4±66.62     | 16:0_14:0_18:0 | 31.21±1.56 |
| 48:1 | 18:1_14:0_16:0 | 40490.89±2024.54 | 18:1_14:0_16:0 | 15.09±0.75 |
| 48:2 | 18:1_12:0_18:1 | 1002.11±50.11    | 18:1_12:0_18:1 | 16.94±0.85 |
| 48:2 | 16:0_18:2_14:0 | 318.29±15.91     | 16:0_14:0_18:2 | 5.79±0.29  |
| 48:2 | 18:1_14:0_16:1 | 244.82±12.24     | 14:0_16:1_18:1 | 4.22±0.21  |
| 48:2 | 16:0_16:1_16:1 | 206.06±10.3      | 16:0_16:1_16:1 | 1.86±0.09  |
| 48:3 | 18:1_12:0_18:2 | 225.82±11.29     | 18:1_12:0_18:2 | 7.67±0.38  |
| 48:4 | 12:0_20:4_16:0 | 45.42±2.27       | 12:0_20:4_16:0 | 0.94±0.05  |
| 48:4 | 14:0_20:4_14:0 | 11.18±0.56       | 14:0_20:4_14:0 | 0.17±0.01  |
| 48:5 | 10:0_16:0_22:5 | 121.41±6.07      | 10:0_22:5_16:0 | 0.99±0.05  |
| 48:6 | -              | -                | 16:0_10:0_22:6 | 2.46±0.12  |
| 49:0 | 17:0_14:0_18:0 | 92.68±4.63       | 17:0_14:0_18:0 | 2.14±0.11  |
| 49:0 | 16:0_15:0_18:0 | 111.39±5.57      | 16:0_15:0_18:0 | 2.37±0.12  |
| 49:0 | 17:0_15:0_17:0 | 26±1.3           | 17:0_15:0_17:0 | 0.51±0.03  |

|      |                 |                  |                 |                |
|------|-----------------|------------------|-----------------|----------------|
| 49:0 | 16:0_17:0_16:0  | 78.67±3.93       | 16:0_17:0_16:0  | 1.45±0.07      |
| 49:1 | 14:0_18:1_17:0  | 96.69±4.83       | 14:0_18:1_17:0  | 1.44±0.07      |
| 49:1 | 15:0__17:1_17:0 | 81721.07±4086.05 | 15:0__17:1_17:0 | 8.15±0.41      |
| 49:1 | 15:0_18:1_16:0  | 81533.73±4076.69 | 16:0_15:0_18:1  | 1.72±0.09      |
| 49:2 | 16:0_18:2_15:0  | 53.22±2.66       | 15:0_16:0_18:2  | 1.67±0.08      |
| 49:2 | 14:0_17:0_18:2  | 36.57±1.83       | 14:0_17:0_18:2  | 1.24±0.06      |
| 49:2 | 15:0_16:1_18:1  | 79.36±3.97       | 15:0_16:1_18:1  | 1.68±0.08      |
| 49:2 | 17:1_16:1_16:0  | 33.13±1.66       | 17:1_16:1_16:0  | 0.96±0.05      |
| 49:2 | 17:1_17:1_15:0  | 20.03±1          | 17:1_17:1_15:0  | 0.6±0.03       |
| 49:2 | 16:1_17:0_16:1  | 8.54±0.43        | 16:1_16:1_17:0  | 0.47±0.02      |
| 49:3 | 15:0_16:1_18:2  | 41.98±2.1        | 15:0_16:1_18:2  | 1.2±0.06       |
| 49:3 | 17:1_18:2_14:0  | 38.6±1.93        | 17:1_18:2_14:0  | 0.54±0.03      |
| 49:3 | 13:0_18:2_18:1  | 40.33±2.02       | 18:2_13:0_18:1  | 1.11±0.06      |
| 49:3 | 14:0_18:3_17:0  | 39.31±1.97       | 17:0_14:0_18:3  | 1.07±0.05      |
| 49:3 | 16:0_15:0_18:3  | 66.88±3.34       | 16:0_15:0_18:3  | 1.92±0.1       |
| 50:0 | 16:0_16:0_18:0  | 3709.06±185.45   | 16:0_16:0_18:0  | 398.4±19.92    |
| 50:0 | 16:0_20:0_14:0  | 159.83±7.99      | 16:0_14:0_20:0  | 0.52±0.03      |
| 50:0 | 18:0_14:0_18:0  | 238.52±11.93     | 18:0_14:0_18:0  | 5624.16±281.21 |
| 50:1 | 18:0_14:0_18:1  | 753.92±37.7      | 18:0_14:0_18:1  | 26.53±1.33     |
| 50:1 | 16:0_18:1_16:0  | 933.73±46.69     | 16:0_16:0_18:1  | 32.32±1.62     |
| 50:2 | 18:1_14:0_18:1  | 15640.2±782.01   | 18:1_14:0_18:1  | 19.06±0.95     |
| 50:2 | 16:0_16:1_18:1  | 756.63±37.83     | 16:0_16:1_18:1  | 5.1±0.26       |

|      |                |                |                |           |
|------|----------------|----------------|----------------|-----------|
| 50:2 | 16:0_16:0_18:2 | 249.06±12.45   | 16:0_16:0_18:2 | 1.14±0.06 |
| 50:3 | 16:0_16:1_18:2 | 372.69±18.63   | 16:0_16:1_18:2 | 3.98±0.2  |
| 50:3 | 18:1_18:2_14:0 | 458.91±22.95   | 18:1_18:2_14:0 | 6.15±0.31 |
| 50:4 | 18:1_14:0_18:3 | 223.8±11.19    | 18:1_14:0_18:3 | 7.77±0.39 |
| 50:4 | 18:2_14:0_18:2 | 67.94±3.4      | 14:0_18:2_18:2 | 1.24±0.06 |
| 50:4 | 14:0_20:4_16:0 | 2863.68±143.18 | 14:0_20:4_16:0 | 1.27±0.06 |
| 50:5 | 14:0_22:5_14:0 | 19.68±0.98     | 14:0_22:5_14:0 | 0.84±0.04 |
| 50:5 | 16:0_12:0_22:5 | 8.48±0.42      | 16:0_12:0_22:5 | 0.12±0.01 |
| 51:0 | 16:0_17:0_18:0 | 174.16±8.71    | 17:0_16:0_18:0 | 4.91±0.25 |
| 51:1 | 16:0_17:0_18:1 | 959.73±47.99   | 16:0_17:0_18:1 | 9.65±0.48 |
| 51:1 | 18:1_15:0_18:0 | 555.65±27.78   | 18:1_15:0_18:0 | 7.26±0.36 |
| 51:2 | 15:0_18:1_18:1 | 110.88±5.54    | 15:0_18:1_18:1 | 3.79±0.19 |
| 51:2 | 16:0_17:1_18:1 | 110.68±5.53    | 16:0_17:1_18:1 | 4.11±0.21 |
| 51:3 | 16:1_17:0_18:2 | 87.35±4.37     | 16:1_17:0_18:2 | 0.98±0.05 |
| 51:3 | 18:2_16:0_17:1 | 58.2±2.91      | 18:2_16:0_17:1 | 0.78±0.04 |
| 51:3 | 18:2_16:0_18:1 | 142.97±7.15    | 18:2_16:0_18:1 | 2.69±0.13 |
| 51:3 | 17:0_16:0_18:3 | 42.53±2.13     | 16:0_17:0_18:3 | 0.4±0.02  |
| 51:4 | -              | -              | 16:0_17:1_18:3 | 0.53±0.03 |
| 51:4 | 18:3_15:0_18:1 | 126.63±6.33    | 18:3_15:0_18:1 | 1.33±0.07 |
| 51:4 | 18:2_18:2_15:0 | 47.5±2.38      | 18:2_15:0_18:2 | 0.68±0.03 |
| 52:0 | 16:0_18:0_18:0 | 297.37±14.87   | 16:0_18:0_18:0 | 4.86±0.24 |
| 52:1 | 16:0_18:0_18:1 | 1963.7±98.19   | 16:0_18:0_18:1 | 39.93±2   |

|      |                |                  |                |            |
|------|----------------|------------------|----------------|------------|
| 52:2 | 16:0_18:2_18:0 | 326.15±16.31     | 16:0_18:2_18:0 | 2.21±0.11  |
| 52:2 | 18:1_16:0_18:1 | 470.74±23.54     | 18:1_16:0_18:1 | 4.09±0.2   |
| 52:3 | 16:0_18:2_18:1 | 1828.77±91.44    | 18:2_16:0_18:1 | 14.22±0.71 |
| 52:4 | 18:1_16:0_18:3 | 427.56±21.38     | 18:1_16:0_18:3 | 8.8±0.44   |
| 52:4 | 16:0_18:2_18:2 | 238.15±11.91     | 16:0_18:2_18:2 | 6.56±0.33  |
| 52:5 | -              | -                | 14:0_16:0_22:5 | 0.1±0.01   |
| 52:5 | 14:0_20:4_18:1 | 29.88±1.5        | -              | -          |
| 52:6 | 18:1_14:0_20:5 | 120.43±6.02      | 18:1_14:0_20:5 | 1.83±0.09  |
| 52:6 | 14:0_20:4_18:2 | 39.3±1.97        | 14:0_18:2_20:4 | 0.28±0.01  |
| 53:0 | 23:0_14:0_16:0 | 56.91±2.85       | 23:0_14:0_16:0 | 0.6±0.03   |
| 53:0 | 14:0_21:0_18:0 | 42.38±2.12       | 21:0_14:0_18:0 | 0.52±0.03  |
| 53:0 | 15:0_15:0_23:0 | 21.18±1.06       | 15:0_15:0_23:0 | 0.39±0.02  |
| 53:0 | 17:0_15:0_21:0 | 39.92±2          | 17:0_15:0_21:0 | 0.86±0.04  |
| 53:0 | 16:0_21:0_16:0 | 27.55±1.38       | 21:0_16:0_16:0 | 0.38±0.02  |
| 53:0 | 16:0_19:0_18:0 | 25.09±1.25       | 19:0_16:0_18:0 | 0.83±0.04  |
| 53:0 | 17:0_18:0_18:0 | 15.26±0.76       | 18:0_17:0_18:0 | 0.57±0.03  |
| 53:0 | 19:0_17:0_17:0 | 16.65±0.83       | 19:0_17:0_17:0 | 0.45±0.02  |
| 53:1 | 16:0_18:1_19:0 | 67.22±3.36       | 16:0_18:1_19:0 | 1.37±0.07  |
| 53:1 | 17:0_18:1_18:0 | 118.73±5.94      | 17:0_18:1_18:0 | 3.45±0.17  |
| 53:2 | 18:1_17:0_18:1 | 54219.68±2710.98 | 18:1_17:0_18:1 | 3.06±0.15  |
| 53:2 | 18:0_17:0_18:2 | 53879.08±2693.95 | 17:0_18:2_18:0 | 1.71±0.09  |
| 53:3 | 17:0_18:1_18:2 | 84.46±4.22       | 18:1_17:0_18:2 | 4.02±0.2   |



|      |                |                |                |            |
|------|----------------|----------------|----------------|------------|
| 53:3 | 18:1_17:1_18:1 | 51.84±2.59     | 17:1_18:1_18:1 | 2.4±0.12   |
| 53:4 | 17:1_18:1_18:2 | 127.87±6.39    | 18:1_17:1_18:2 | 1.86±0.09  |
| 53:4 | 18:1_17:0_18:3 | 137.81±6.89    | 18:1_17:0_18:3 | 1.53±0.08  |
| 54:0 | 16:0_20:0_18:0 | 129.17±6.46    | 16:0_20:0_18:0 | 1.88±0.09  |
| 54:1 | 18:0_18:1_18:0 | 759.54±37.98   | 18:1_18:0_18:0 | 6.00±0.3   |
| 54:1 | 18:1_16:0_20:0 | 439.39±21.97   | 18:1_20:0_16:0 | 6.67±0.33  |
| 54:2 | 18:1_18:0_18:1 | 1320.81±66.04  | 18:1_18:1_18:0 | 25.19±1.26 |
| 54:3 | 18:1_18:1_18:1 | 5150.26±257.51 | 18:1_18:1_18:1 | 84.23±4.21 |
| 54:4 | 18:1_18:1_18:2 | 558.17±27.91   | 18:1_18:1_18:2 | 7.01±0.35  |
| 54:6 | 18:1_16:0_20:5 | 97.46±4.87     | 18:1_16:0_20:5 | 0.46±0.02  |
| 54:7 | 18:2_16:0_20:5 | 66.71±3.34     | -              | -          |
| 55:0 | -              | -              | 14:0_18:0_23:0 | 1.04±0.05  |
| 55:0 | -              | -              | 16:0_21:0_18:0 | 0.47±0.02  |
| 55:0 | 16:0_23:0_16:0 | 199.55±9.98    | 16:0_23:0_16:0 | 0.49±0.02  |
| 55:1 | -              | -              | 21:0_16:0_18:1 | 3.33±0.17  |
| 55:1 | -              | -              | 16:0_23:1_16:0 | 0.61±0.03  |
| 55:2 | 18:0_19:1_18:1 | 177.33±8.87    | 18:0_18:1_19:1 | 2.44±0.12  |
| 55:2 | 18:1_18:1_19:0 | 127.77±6.39    | 18:1_19:0_18:1 | 1.41±0.07  |
| 55:3 | 18:1_18:1_19:1 | 257.83±12.89   | 18:1_18:1_19:1 | 3.01±0.15  |
| 56:0 | 26:0_14:0_16:0 | 47.01±2.35     | 26:0_14:0_16:0 | 0.34±0.02  |
| 56:0 | 18:0_14:0_24:0 | 48.04±2.4      | 18:0_24:0_14:0 | 115.97±5.8 |
| 56:0 | 16:0_22:0_18:0 | 48.43±2.42     | 22:0_16:0_18:0 | 115.96±5.8 |

|      |                |              |                |              |
|------|----------------|--------------|----------------|--------------|
| 56:0 | 24:0_16:0_16:0 | 22.16±1.11   | 24:0_16:0_16:0 | 0.13±0.01    |
| 56:1 | 22:0_16:0_18:1 | 222.01±11.1  | 22:0_16:0_18:1 | 2.16±0.11    |
| 56:1 | 16:0_16:1_24:0 | 87.29±4.36   | 16:0_16:1_24:0 | 0.85±0.04    |
| 56:1 | 18:1_20:0_18:0 | 139.01±6.95  | 18:1_20:0_18:0 | 1.23±0.06    |
| 56:1 | 18:0_24:1_18:0 | 40.17±2.01   | 18:0_24:1_18:0 | 0.51±0.03    |
| 56:1 | 16:0_20:0_20:1 | 117.61±5.88  | 16:0_20:1_20:0 | 0.27±0.01    |
| 56:1 | 16:0_16:0_24:1 | 30.44±1.52   | 16:0_16:0_24:1 | 0.25±0.01    |
| 56:2 | 16:0_20:1_20:1 | 41.61±2.08   | 16:0_20:1_20:1 | 0.55±0.03    |
| 56:2 | 18:0_20:1_18:1 | 135.47±6.77  | 18:0_20:1_18:1 | 2.32±0.12    |
| 56:2 | 16:0_22:1_18:1 | 123.95±6.2   | 18:1_16:0_22:1 | 2.00±0.1     |
| 56:3 | 18:1_20:1_18:1 | 199.87±9.99  | 18:1_20:1_18:1 | 863.34±43.17 |
| 56:4 | 18:0_18:1_20:3 | 131.43±6.57  | 18:0_18:1_20:3 | 1.89±0.09    |
| 56:4 | 16:0_18:1_22:3 | 75.56±3.78+  | 16:0_18:1_22:3 | 1.19±0.06    |
| 56:5 | 16:0_22:4_18:1 | 79.48±3.97   | 16:0_22:4_18:1 | 0.86±0.04    |
| 56:6 | 16:0_18:1_22:5 | 292.81±14.64 | 18:1_16:0_22:5 | 1.51±0.08    |
| 56:7 | -              | -            | 18:1_16:0_22:6 | 1.87±0.09    |
| 57:1 | 18:0_21:0_18:1 | 52.45±2.62   | 18:1_18:0_21:0 | 1.02±0.05    |
| 57:1 | 16:0_25:1_16:0 | 52.07±2.6    | 16:0_25:1_16:0 | 0.4±0.02     |
| 57:1 | -              | -            | 16:0_23:1_18:0 | 0.34±0.02    |
| 57:1 | 23:0_16:0_18:1 | 112.99±5.95  | 23:0_16:0_18:1 | 1.47±0.07    |
| 58:1 | 18:1_16:0_24:0 | 34.07±1.7    | 18:1_16:0_24:0 | 0.46±0.02    |
| 58:1 | 18:1_18:0_22:0 | 27.38±1.37   | -              | -            |

|      |                |              |                |           |
|------|----------------|--------------|----------------|-----------|
| 58:2 | 16:0_24:1_18:1 | 213.25±10.66 | 16:0_24:1_18:1 | 1.63±0.08 |
| 58:7 | -              | -            | 18:1_18:1_22:5 | 1.32±0.07 |
| 59:1 | 18:1_16:0_25:0 | 39.69±1.98   | -              | -         |
